# Supplementary material for: Therapeutic Targeting of the Premetastatic Stage in Human Lung-to-Brain Metastasis
Source: Oxford University Press journal article supplement (doi:10.1158/0008-5472.can-18-1022), 2018-07-09
Supplement: 00085472can181022-sup-199669_2_supp_4846291_phqlp5.xlsx [file 00085472can181022-sup-199669_2_supp_4846291_phqlp5.xlsx]

## Sheet: CMAP
ID	Connectivity.score	P.value
exisulind	-0.75624	0.00405396
STOCK1N-35696	-0.706775	0.287154
TTNPB	-0.59715	0.363245
imatinib	-0.5883	0.00183141
AH-6809	-0.51576	0.240748
irinotecan	-0.383815	6.88236e-05
GW-8510	-0.345205	5.76645e-05
phenoxybenzamine	-0.305825	5.35389e-05
mycophenolic acid	-0.288655	6.28462e-05
methotrexate	-0.28	6.02111e-05
HC toxin	-0.27469	0.000223636
mebendazole	-0.27214	0.000110503
0173570-0000	-0.26159	5.78433e-05
kaempferol	-0.257355	6.32117e-05
lomustine	-0.251195	0.00142454
fenbufen	-0.248555	0.000479702
apomorphine	-0.248175	7.24423e-05
betulinic acid	-0.24815	0.00131235
semustine	-0.24761	0.000236301
CP-645525-01	-0.24662	0.437695
vinblastine	-0.24533	0.0226543
harmol	-0.244745	0.00195942
etynodiol	-0.2423	0.00350464
PHA-00851261E	-0.240165	0.000152595
acacetin	-0.23993	0.000212983
5182598	-0.239695	0.000106893
PHA-00767505E	-0.23816	0.00149396
CP-944629	-0.23814	0.00760477
CP-863187	-0.23594	0.00140643
troglitazone	-0.23554	5.43161e-05
indometacin	-0.234885	0.934099
vidarabine	-0.234205	7.70404e-05
genistein	-0.23309	0.00104778
reserpine	-0.231465	0.00018414
amantadine	-0.23105	5.26412e-05
PF-00875133-00	-0.2307	0.565612
hexestrol	-0.22977	0.0181027
suramin sodium	-0.22824	0.00220789
5248896	-0.227845	6.65949e-05
flupentixol	-0.22696	6.69375e-05
monastrol	-0.226405	5.66827e-05
pirinixic acid	-0.226355	0.000744936
simvastatin	-0.22467	0.00150318
5286656	-0.22196	0.00181972
tropicamide	-0.221865	0.0210942
BCB000040	-0.221605	0.0120974
rescinnamine	-0.22105	0.0021583
equilin	-0.22036	0.000101258
Prestwick-1103	-0.21994	0.00655273
PF-01378883-00	-0.217225	0.0373795
PF-00539758-00	-0.21601	0.746443
lynestrenol	-0.21463	0.00457263
methyldopate	-0.21329	0.0243302
ethaverine	-0.210775	9.40992e-05
selegiline	-0.210685	0.00725762
hydrocotarnine	-0.21048	0.00385683
Prestwick-682	-0.20896	0.00240768
tobramycin	-0.208445	0.0204098
15(S)-15-methylprostaglandin E2	-0.208195	0.0921846
phentolamine	-0.20703	0.00155892
abamectin	-0.206215	0.00127881
H-89	-0.20535	0.889845
propylthiouracil	-0.20264	0.0152569
lomefloxacin	-0.202525	0.00448406
epiandrosterone	-0.201335	0.00280926
5152487	-0.201085	0.0315286
phenanthridinone	-0.199915	0.0818058
eldeline	-0.19933	0.000168925
nilutamide	-0.19834	0.00237215
finasteride	-0.1983	0.999727
mephenesin	-0.19792	0.00111353
meclocycline	-0.197895	0.0819808
spaglumic acid	-0.197835	0.004165
coralyne	-0.19775	0.00168276
desoxycortone	-0.1977	0.0668823
dipyridamole	-0.197575	0.0462325
cloxacillin	-0.19739	0.0250337
alfaxalone	-0.197355	0.00861944
hydrocortisone	-0.197275	0.0062991
nicergoline	-0.197175	0.00345274
sotalol	-0.196965	0.00199315
riboflavin	-0.19675	0.0040353
stachydrine	-0.196075	0.0020372
lidoflazine	-0.1959	0.00619595
tolmetin	-0.195745	0.00359837
PHA-00745360	-0.195725	0.999652
cefepime	-0.195435	0.00187027
ioxaglic acid	-0.195115	0.00315386
cefadroxil	-0.194095	0.00235984
ivermectin	-0.19362	0.055138
piromidic acid	-0.193435	0.00948525
vancomycin	-0.19316	0.0322787
adipiodone	-0.19279	0.00267185
testosterone	-0.19276	0.00833164
amrinone	-0.192755	0.0083535
methyldopa	-0.192715	0.00725472
miconazole	-0.19105	0.00975666
cinoxacin	-0.18977	0.268214
ticarcillin	-0.18972	0.0478211
hecogenin	-0.189435	0.00723755
benzocaine	-0.18923	0.000954647
nicardipine	-0.18871	0.288536
lymecycline	-0.18823	0.0184367
flutamide	-0.18737	0.0234385
diethylstilbestrol	-0.186645	0.7864
hydroxyachillin	-0.186175	0.0646546
zoxazolamine	-0.18607	0.0423735
pentolonium	-0.18555	0.0146354
papaverine	-0.184155	0.0732266
seneciphylline	-0.184005	0.103493
(-)-catechin	-0.18392	0.0846306
esculin	-0.18243	0.11848
quinidine	-0.182365	0.0282871
amylocaine	-0.18189	0.112764
Prestwick-674	-0.18179	0.0846854
tetroquinone	-0.181535	0.0261651
sulfabenzamide	-0.181525	0.189827
niflumic acid	-0.18145	0.0938993
fluticasone	-0.18122	0.839848
xamoterol	-0.18118	0.0363299
nimodipine	-0.17923	0.0807745
mefenamic acid	-0.17833	0.323091
chlorogenic acid	-0.178075	0.999999
loracarbef	-0.17715	0.126733
Y-27632	-0.17705	0.366926
bretylium tosilate	-0.17683	0.0531183
midodrine	-0.17635	0.20677
urapidil	-0.17613	0.012821
butyl hydroxybenzoate	-0.175245	0.548583
raubasine	-0.174955	0.0668047
dizocilpine	-0.17455	0.369938
scopoletin	-0.173715	0.549908
pancuronium bromide	-0.17304	0.113097
isoxsuprine	-0.17299	0.325926
neomycin	-0.172875	0.448335
moxonidine	-0.17281	0.419903
ganciclovir	-0.17235	0.243919
gliquidone	-0.172265	0.0348668
articaine	-0.171885	0.424879
citalopram	-0.171	0.613582
pirenzepine	-0.17042	0.30584
pirenperone	-0.168735	0.435715
glycocholic acid	-0.168155	0.454559
glimepiride	-0.16648	0.370409
biotin	-0.166005	0.353684
alcuronium chloride	-0.1651	0.801099
difenidol	-0.164375	0.752046
mebhydrolin	-0.16397	0.247204
bephenium hydroxynaphthoate	-0.16278	0.679913
pyridoxine	-0.158195	0.805091
furaltadone	-0.15129	0.97753
metformin	0	1
phenformin	0	1
valproic acid	0	1
estradiol	0	1
alpha-estradiol	0	1
dexamethasone	0	1
mesalazine	0	1
chlorpropamide	0	1
tolbutamide	0	1
tamoxifen	0	1
verapamil	0	1
rofecoxib	0	1
amitriptyline	0	1
sulindac	0	1
tacrolimus	0	1
raloxifene	0	1
nordihydroguaiaretic acid	0	1
sulfasalazine	0	1
celecoxib	0	1
LM-1685	0	1
SC-58125	0	1
tretinoin	0	1
ciclosporin	0	1
clofibrate	0	1
MK-886	0	1
prednisolone	0	1
thalidomide	0	1
fludrocortisone	0	1
quercetin	0	1
staurosporine	0	1
NU-1025	0	1
acetylsalicylic acid	0	1
flufenamic acid	0	1
sirolimus	0	1
arachidonyltrifluoromethane	0	1
trichostatin A	0	1
diclofenac	0	1
mercaptopurine	0	1
nifedipine	0	1
nitrendipine	0	1
felodipine	0	1
azathioprine	0	1
sodium phenylbutyrate	0	1
novobiocin	0	1
fasudil	0	1
rosiglitazone	0	1
cobalt chloride	0	1
wortmannin	0	1
tetraethylenepentamine	0	1
haloperidol	0	1
trifluoperazine	0	1
iloprost	0	1
copper sulfate	0	1
arachidonic acid	0	1
quinpirole	0	1
deferoxamine	0	1
calmidazolium	0	1
fluphenazine	0	1
4,5-dianilinophthalimide	0	1
butein	0	1
bucladesine	0	1
probucol	0	1
resveratrol	0	1
nocodazole	0	1
benserazide	0	1
pentamidine	0	1
paclitaxel	0	1
docosahexaenoic acid ethyl ester	0	1
butirosin	0	1
colforsin	0	1
rottlerin	0	1
prazosin	0	1
5252917	0	1
5255229	0	1
5211181	0	1
carbamazepine	0	1
blebbistatin	0	1
5224221	0	1
5279552	0	1
5253409	0	1
5230742	0	1
oxaprozin	0	1
quinostatin	0	1
ikarugamycin	0	1
ionomycin	0	1
depudecin	0	1
5149715	0	1
5162773	0	1
pararosaniline	0	1
5213008	0	1
5186324	0	1
5114445	0	1
5151277	0	1
clotrimazole	0	1
5140203	0	1
topiramate	0	1
decitabine	0	1
vorinostat	0	1
demecolcine	0	1
monensin	0	1
12,13-EODE	0	1
3-hydroxy-DL-kynurenine	0	1
doxycycline	0	1
tyrphostin AG-825	0	1
DL-PPMP	0	1
BW-B70C	0	1
tyrphostin AG-1478	0	1
procainamide	0	1
thioguanosine	0	1
naftidrofuryl	0	1
pentoxyverine	0	1
N6-methyladenosine	0	1
cefalexin	0	1
bezafibrate	0	1
dequalinium chloride	0	1
oxantel	0	1
guanfacine	0	1
ritodrine	0	1
dextromethorphan	0	1
buspirone	0	1
ketoconazole	0	1
bisoprolol	0	1
droperidol	0	1
benzbromarone	0	1
clebopride	0	1
fusidic acid	0	1
hesperidin	0	1
androsterone	0	1
suloctidil	0	1
domperidone	0	1
arecoline	0	1
corticosterone	0	1
fusaric acid	0	1
lactobionic acid	0	1
cefixime	0	1
calcium pantothenate	0	1
carbarsone	0	1
cyanocobalamin	0	1
lumicolchicine	0	1
metrizamide	0	1
dl-alpha tocopherol	0	1
apigenin	0	1
7-aminocephalosporanic acid	0	1
ginkgolide A	0	1
lysergol	0	1
N-acetylmuramic acid	0	1
piperine	0	1
pepstatin	0	1
N-acetyl-L-aspartic acid	0	1
Chicago Sky Blue 6B	0	1
cyclobenzaprine	0	1
myricetin	0	1
brompheniramine	0	1
SR-95639A	0	1
bacampicillin	0	1
buflomedil	0	1
carteolol	0	1
naringenin	0	1
primaquine	0	1
naltrexone	0	1
astemizole	0	1
diazoxide	0	1
disulfiram	0	1
atropine oxide	0	1
chlorphenamine	0	1
isoconazole	0	1
clindamycin	0	1
gallamine triethiodide	0	1
aminophenazone	0	1
nomifensine	0	1
nalbuphine	0	1
spironolactone	0	1
mianserin	0	1
picotamide	0	1
cefotaxime	0	1
thioproperazine	0	1
dihydrostreptomycin	0	1
pindolol	0	1
acenocoumarol	0	1
triamcinolone	0	1
tetracycline	0	1
isoniazid	0	1
tranexamic acid	0	1
ampyrone	0	1
ranitidine	0	1
piroxicam	0	1
norfloxacin	0	1
etodolac	0	1
pentetrazol	0	1
etofylline	0	1
levamisole	0	1
tiratricol	0	1
antimycin A	0	1
scopolamine N-oxide	0	1
chlorzoxazone	0	1
pargyline	0	1
fenspiride	0	1
xylometazoline	0	1
alverine	0	1
nimesulide	0	1
flumequine	0	1
oxymetazoline	0	1
chlorphenesin	0	1
aztreonam	0	1
hydrastinine	0	1
tolfenamic acid	0	1
mefexamide	0	1
nifenazone	0	1
metampicillin	0	1
mafenide	0	1
iproniazid	0	1
pentoxifylline	0	1
cimetidine	0	1
troleandomycin	0	1
naphazoline	0	1
sulpiride	0	1
minaprine	0	1
cinchocaine	0	1
amiloride	0	1
levodopa	0	1
doxylamine	0	1
pyrimethamine	0	1
ticlopidine	0	1
oxybuprocaine	0	1
prednisone	0	1
amprolium	0	1
ethambutol	0	1
hexamethonium bromide	0	1
oxetacaine	0	1
hydrochlorothiazide	0	1
captopril	0	1
phenazone	0	1
diflunisal	0	1
pheniramine	0	1
acebutolol	0	1
diphemanil metilsulfate	0	1
sulfaguanidine	0	1
minoxidil	0	1
4-hydroxyphenazone	0	1
lidocaine	0	1
tolazoline	0	1
trimethobenzamide	0	1
metronidazole	0	1
khellin	0	1
naloxone	0	1
glipizide	0	1
erythromycin	0	1
cotinine	0	1
zimeldine	0	1
amoxapine	0	1
metolazone	0	1
metanephrine	0	1
loxapine	0	1
oleandomycin	0	1
edrophonium chloride	0	1
azacyclonol	0	1
cyproheptadine	0	1
ciprofloxacin	0	1
hydroxyzine	0	1
chlorhexidine	0	1
midecamycin	0	1
famotidine	0	1
ampicillin	0	1
hesperetin	0	1
diltiazem	0	1
josamycin	0	1
baclofen	0	1
danazol	0	1
perphenazine	0	1
chlortetracycline	0	1
aciclovir	0	1
guanabenz	0	1
lisuride	0	1
glibenclamide	0	1
albendazole	0	1
oxybutynin	0	1
benzydamine	0	1
oxytetracycline	0	1
guanethidine	0	1
clonidine	0	1
antazoline	0	1
vinpocetine	0	1
cinnarizine	0	1
spiperone	0	1
fipexide	0	1
pimozide	0	1
bupropion	0	1
clomipramine	0	1
methylprednisolone	0	1
mepyramine	0	1
mifepristone	0	1
alprenolol	0	1
praziquantel	0	1
fendiline	0	1
sulfinpyrazone	0	1
mebeverine	0	1
streptomycin	0	1
tremorine	0	1
furosemide	0	1
chlortalidone	0	1
bambuterol	0	1
ketotifen	0	1
terbutaline	0	1
practolol	0	1
methapyrilene	0	1
debrisoquine	0	1
betaxolol	0	1
ketanserin	0	1
zidovudine	0	1
desipramine	0	1
enoxacin	0	1
hemicholinium	0	1
phenylpropanolamine	0	1
sulfafurazole	0	1
clorgiline	0	1
clopamide	0	1
metergoline	0	1
kanamycin	0	1
ascorbic acid	0	1
zaprinast	0	1
clenbuterol	0	1
brinzolamide	0	1
metitepine	0	1
amikacin	0	1
chlormezanone	0	1
adenosine phosphate	0	1
vanoxerine	0	1
cefoperazone	0	1
8-azaguanine	0	1
meticrane	0	1
sulfaphenazole	0	1
metrifonate	0	1
morantel	0	1
todralazine	0	1
allantoin	0	1
benzonatate	0	1
dexpanthenol	0	1
epirizole	0	1
moxisylyte	0	1
homatropine	0	1
imipramine	0	1
acetazolamide	0	1
hydroflumethiazide	0	1
sulfadiazine	0	1
diprophylline	0	1
betazole	0	1
triflupromazine	0	1
sulfacetamide	0	1
noretynodrel	0	1
triamterene	0	1
isoxicam	0	1
atracurium besilate	0	1
heptaminol	0	1
thiamphenicol	0	1
dapsone	0	1
naproxen	0	1
acetohexamide	0	1
diphenhydramine	0	1
adiphenine	0	1
piracetam	0	1
molsidomine	0	1
dirithromycin	0	1
artemisinin	0	1
budesonide	0	1
triflusal	0	1
phenindione	0	1
chloroquine	0	1
gliclazide	0	1
ceftazidime	0	1
bromperidol	0	1
thiocolchicoside	0	1
trimetazidine	0	1
Prestwick-559	0	1
etamivan	0	1
cyclizine	0	1
clorsulon	0	1
tubocurarine chloride	0	1
tetracaine	0	1
hydrastine hydrochloride	0	1
laudanosine	0	1
scoulerine	0	1
10-methoxyharmalan	0	1
thiamine	0	1
dihydroergocristine	0	1
mometasone	0	1
lobelanidine	0	1
ajmaline	0	1
dipivefrine	0	1
noscapine	0	1
tomatidine	0	1
tetrahydroalstonine	0	1
monocrotaline	0	1
harmine	0	1
syrosingopine	0	1
dacarbazine	0	1
ellipticine	0	1
cytisine	0	1
atropine	0	1
ipratropium bromide	0	1
lobeline	0	1
calycanthine	0	1
1,4-chrysenequinone	0	1
pseudopelletierine	0	1
hydroquinine	0	1
physostigmine	0	1
acepromazine	0	1
berberine	0	1
convolamine	0	1
cinchonidine	0	1
racecadotril	0	1
epivincamine	0	1
aconitine	0	1
isocorydine	0	1
vinburnine	0	1
quipazine	0	1
folic acid	0	1
chloramphenicol	0	1
isoflupredone	0	1
canrenoic acid	0	1
ursolic acid	0	1
gentamicin	0	1
methocarbamol	0	1
aceclofenac	0	1
galantamine	0	1
xylazine	0	1
cinchonine	0	1
sparteine	0	1
conessine	0	1
co-dergocrine mesilate	0	1
bicuculline	0	1
canavanine	0	1
diflorasone	0	1
protoveratrine A	0	1
trimethylcolchicinic acid	0	1
yohimbic acid	0	1
boldine	0	1
harmaline	0	1
harman	0	1
solanine	0	1
vitexin	0	1
dydrogesterone	0	1
Prestwick-642	0	1
picrotoxinin	0	1
gelsemine	0	1
canadine	0	1
Prestwick-692	0	1
succinylsulfathiazole	0	1
flunisolide	0	1
mepenzolate bromide	0	1
solasodine	0	1
pempidine	0	1
promazine	0	1
famprofazone	0	1
metamizole sodium	0	1
citiolone	0	1
heliotrine	0	1
sulfamerazine	0	1
bromopride	0	1
isosorbide	0	1
fludroxycortide	0	1
halcinonide	0	1
Prestwick-665	0	1
Prestwick-675	0	1
Prestwick-685	0	1
methylbenzethonium chloride	0	1
beta-escin	0	1
ethotoin	0	1
myosmine	0	1
foliosidine	0	1
karakoline	0	1
etiocholanolone	0	1
diphenylpyraline	0	1
betonicine	0	1
griseofulvin	0	1
dilazep	0	1
riluzole	0	1
sulfamethoxazole	0	1
nalidixic acid	0	1
metaraminol	0	1
kawain	0	1
clemizole	0	1
ofloxacin	0	1
nitrofurantoin	0	1
salbutamol	0	1
trimethoprim	0	1
hydralazine	0	1
6-benzylaminopurine	0	1
prilocaine	0	1
metoclopramide	0	1
ketoprofen	0	1
nefopam	0	1
camptothecin	0	1
indapamide	0	1
mexiletine	0	1
ethisterone	0	1
vincamine	0	1
dantrolene	0	1
fenbendazole	0	1
proglumide	0	1
lisinopril	0	1
ifenprodil	0	1
flavoxate	0	1
triprolidine	0	1
trazodone	0	1
lincomycin	0	1
flunarizine	0	1
bufexamac	0	1
norethisterone	0	1
doxepin	0	1
cortisone	0	1
homochlorcyclizine	0	1
glafenine	0	1
telenzepine	0	1
aminoglutethimide	0	1
nortriptyline	0	1
dyclonine	0	1
diethylcarbamazine	0	1
pimethixene	0	1
econazole	0	1
enalapril	0	1
dropropizine	0	1
dimenhydrinate	0	1
fenofibrate	0	1
chenodeoxycholic acid	0	1
pergolide	0	1
bupivacaine	0	1
pinacidil	0	1
disopyramide	0	1
bumetanide	0	1
acemetacin	0	1
clemastine	0	1
naringin	0	1
progesterone	0	1
butoconazole	0	1
velnacrine	0	1
melatonin	0	1
neostigmine bromide	0	1
amiodarone	0	1
carbimazole	0	1
pilocarpine	0	1
menadione	0	1
niridazole	0	1
ergocalciferol	0	1
cisapride	0	1
dicloxacillin	0	1
ceforanide	0	1
serotonin	0	1
vigabatrin	0	1
fluoxetine	0	1
ciclopirox	0	1
cefotiam	0	1
nitrofural	0	1
biperiden	0	1
iohexol	0	1
salsolidin	0	1
probenecid	0	1
6-azathymine	0	1
omeprazole	0	1
cetirizine	0	1
norcyclobenzaprine	0	1
L-methionine sulfoximine	0	1
benperidol	0	1
etifenin	0	1
tiabendazole	0	1
atovaquone	0	1
tolazamide	0	1
cefaclor	0	1
terconazole	0	1
orciprenaline	0	1
trimethadione	0	1
rifampicin	0	1
tetramisole	0	1
nifuroxazide	0	1
colistin	0	1
tiaprofenic acid	0	1
lovastatin	0	1
ethionamide	0	1
R-atenolol	0	1
pregnenolone	0	1
nystatin	0	1
tenoxicam	0	1
suxibuzone	0	1
skimmianine	0	1
ricinine	0	1
estropipate	0	1
fluorometholone	0	1
etanidazole	0	1
anabasine	0	1
delsoline	0	1
Prestwick-689	0	1
trioxysalen	0	1
cefalotin	0	1
tetrandrine	0	1
fluorocurarine	0	1
napelline	0	1
cefmetazole	0	1
cefuroxime	0	1
sulfaquinoxaline	0	1
nadide	0	1
terazosin	0	1
butamben	0	1
alclometasone	0	1
ramifenazone	0	1
streptozocin	0	1
sulfamethizole	0	1
phenazopyridine	0	1
podophyllotoxin	0	1
propidium iodide	0	1
pheneticillin	0	1
metoprolol	0	1
medrysone	0	1
demeclocycline	0	1
meclofenoxate	0	1
levonorgestrel	0	1
sulfamethoxypyridazine	0	1
flumetasone	0	1
flunixin	0	1
fenoprofen	0	1
bendroflumethiazide	0	1
eucatropine	0	1
flecainide	0	1
spiramycin	0	1
ethoxyquin	0	1
sulfadimidine	0	1
dicoumarol	0	1
isocarboxazid	0	1
mephentermine	0	1
cefazolin	0	1
glycopyrronium bromide	0	1
tinidazole	0	1
guaifenesin	0	1
thiamazole	0	1
lithocholic acid	0	1
atractyloside	0	1
guanadrel	0	1
alexidine	0	1
merbromin	0	1
sulfadimethoxine	0	1
calcium folinate	0	1
mimosine	0	1
ribostamycin	0	1
proadifen	0	1
hexylcaine	0	1
sulfanilamide	0	1
isoetarine	0	1
sulfametoxydiazine	0	1
zomepirac	0	1
pridinol	0	1
ebselen	0	1
mevalolactone	0	1
pipenzolate bromide	0	1
isopropamide iodide	0	1
carbinoxamine	0	1
bergenin	0	1
azlocillin	0	1
butacaine	0	1
cefapirin	0	1
gabapentin	0	1
iopamidol	0	1
methazolamide	0	1
clidinium bromide	0	1
cefoxitin	0	1
alimemazine	0	1
iopromide	0	1
pyrithyldione	0	1
sulfamonomethoxine	0	1
DL-thiorphan	0	1
corynanthine	0	1
salsolinol	0	1
Prestwick-691	0	1
harmalol	0	1
metacycline	0	1
Prestwick-984	0	1
cyclopenthiazide	0	1
etofenamate	0	1
nifurtimox	0	1
gibberellic acid	0	1
naftopidil	0	1
sitosterol	0	1
apramycin	0	1
etamsylate	0	1
letrozole	0	1
tracazolate	0	1
cefalonium	0	1
epitiostanol	0	1
Prestwick-967	0	1
sanguinarine	0	1
fursultiamine	0	1
etilefrine	0	1
tocainide	0	1
zalcitabine	0	1
decamethonium bromide	0	1
memantine	0	1
harpagoside	0	1
zuclopenthixol	0	1
gabexate	0	1
benzathine benzylpenicillin	0	1
3-acetamidocoumarin	0	1
ozagrel	0	1
asiaticoside	0	1
proguanil	0	1
tribenoside	0	1
risperidone	0	1
levocabastine	0	1
roxarsone	0	1
piribedil	0	1
betulin	0	1
talampicillin	0	1
rimexolone	0	1
etomidate	0	1
moracizine	0	1
phensuximide	0	1
netilmicin	0	1
tridihexethyl	0	1
lansoprazole	0	1
cyclic adenosine monophosphate	0	1
penbutolol	0	1
pivmecillinam	0	1
naftifine	0	1
bethanechol	0	1
Prestwick-1083	0	1
viomycin	0	1
levopropoxyphene	0	1
nafcillin	0	1
liothyronine	0	1
etidronic acid	0	1
theophylline	0	1
spectinomycin	0	1
cefsulodin	0	1
procyclidine	0	1
roxithromycin	0	1
theobromine	0	1
fosfosal	0	1
trichlormethiazide	0	1
amiprilose	0	1
beclometasone	0	1
trimipramine	0	1
suprofen	0	1
oxolamine	0	1
indoprofen	0	1
mestranol	0	1
arcaine	0	1
chloropyramine	0	1
(+/-)-catechin	0	1
propantheline bromide	0	1
carbenoxolone	0	1
levobunolol	0	1
Prestwick-857	0	1
paromomycin	0	1
scopolamine	0	1
furazolidone	0	1
nadolol	0	1
iocetamic acid	0	1
iodixanol	0	1
paracetamol	0	1
ioversol	0	1
diclofenamide	0	1
latamoxef	0	1
dimethadione	0	1
rolitetracycline	0	1
fluvastatin	0	1
phthalylsulfathiazole	0	1
capsaicin	0	1
sulconazole	0	1
aminophylline	0	1
profenamine	0	1
Prestwick-860	0	1
luteolin	0	1
carbachol	0	1
nicotinic acid	0	1
3-acetylcoumarin	0	1
hymecromone	0	1
(+)-isoprenaline	0	1
nizatidine	0	1
propofol	0	1
pentetic acid	0	1
crotamiton	0	1
bemegride	0	1
caffeic acid	0	1
monobenzone	0	1
thioperamide	0	1
propranolol	0	1
diloxanide	0	1
2-aminobenzenesulfonamide	0	1
primidone	0	1
pralidoxime	0	1
(-)-atenolol	0	1
meglumine	0	1
metyrapone	0	1
estrone	0	1
rolipram	0	1
flucytosine	0	1
tyloxapol	0	1
cantharidin	0	1
aminohippuric acid	0	1
lorglumide	0	1
terguride	0	1
florfenicol	0	1
clioquinol	0	1
N-acetyl-L-leucine	0	1
idazoxan	0	1
altretamine	0	1
megestrol	0	1
oxybenzone	0	1
pipemidic acid	0	1
flurbiprofen	0	1
prasterone	0	1
promethazine	0	1
dioxybenzone	0	1
ursodeoxycholic acid	0	1
chrysin	0	1
adrenosterone	0	1
bacitracin	0	1
ketorolac	0	1
octopamine	0	1
proxyphylline	0	1
nisoxetine	0	1
esculetin	0	1
aminocaproic acid	0	1
remoxipride	0	1
Prestwick-981	0	1
alfadolone	0	1
flucloxacillin	0	1
isradipine	0	1
halofantrine	0	1
Prestwick-972	0	1
rilmenidine	0	1
pizotifen	0	1
trapidil	0	1
enilconazole	0	1
pirlindole	0	1
ribavirin	0	1
azapropazone	0	1
deptropine	0	1
isometheptene	0	1
mitoxantrone	0	1
doxorubicin	0	1
azacitidine	0	1
fluocinonide	0	1
piperacillin	0	1
cefamandole	0	1
levomepromazine	0	1
dienestrol	0	1
methacholine chloride	0	1
cromoglicic acid	0	1
ifosfamide	0	1
mecamylamine	0	1
Prestwick-1082	0	1
prednicarbate	0	1
cyproterone	0	1
sulfadoxine	0	1
natamycin	0	1
saquinavir	0	1
sertaconazole	0	1
piperidolate	0	1
milrinone	0	1
dexpropranolol	0	1
cyclopentolate	0	1
verteporfin	0	1
ronidazole	0	1
repaglinide	0	1
trifluridine	0	1
methanthelinium bromide	0	1
ciprofibrate	0	1
cycloserine	0	1
estriol	0	1
meropenem	0	1
piretanide	0	1
oxprenolol	0	1
tropine	0	1
chloropyrazine	0	1
ramipril	0	1
azaperone	0	1
piperacetazine	0	1
ondansetron	0	1
thiethylperazine	0	1
benzylpenicillin	0	1
oxedrine	0	1
mephenytoin	0	1
oxyphenbutazone	0	1
propoxycaine	0	1
PNU-0230031	0	1
0179445-0000	0	1
PNU-0251126	0	1
0175029-0000	0	1
0317956-0000	0	1
chlorambucil	0	1
nialamide	0	1
quinethazone	0	1
Prestwick-1100	0	1
parbendazole	0	1
2,6-dimethylpiperidine	0	1
paroxetine	0	1
CP-320650-01	0	1
timolol	0	1
daunorubicin	0	1
nomegestrol	0	1
AG-013608	0	1
rotenone	0	1
PF-00562151-00	0	1
pioglitazone	0	1
H-7	0	1
PF-00539745-00	0	1
erastin	0	1
3-nitropropionic acid	0	1
STOCK1N-35215	0	1
orlistat	0	1
0225151-0000	0	1
5707885	0	1
C-75	0	1
F0447-0125	0	1
5155877	0	1
dinoprostone	0	1
5194442	0	1
6-bromoindirubin-3'-oxime	0	1
STOCK1N-35874	0	1
16,16-dimethylprostaglandin E2	0	1
PNU-0293363	0	1
STOCK1N-28457	0	1
BAS-012416453	0	1
SB-202190	0	1
AH-23848	0	1
PHA-00846566E	0	1
alsterpaullone	0	1
0316684-0000	0	1
SC-19220	0	1
0198306-0000	0	1
CAY-10397	0	1
MS-275	0	1
CP-319743	0	1
meteneprost	0	1
16-phenyltetranorprostaglandin E2	0	1
BCB000039	0	1
IC-86621	0	1
11-deoxy-16,16-dimethylprostaglandin E2	0	1
BCB000038	0	1
sulfachlorpyridazine	0.15298	0.942927
betamethasone	0.156815	0.998099
procaine	0.158625	0.99995
nabumetone	0.16003	0.967707
Prestwick-920	0.160625	0.803734
dehydrocholic acid	0.16085	0.8542
minocycline	0.16198	0.673973
tiletamine	0.16236	0.860844
yohimbine	0.163325	0.882972
denatonium benzoate	0.16362	0.878184
tolnaftate	0.163825	0.399419
SR-95531	0.16401	0.115328
Prestwick-664	0.16573	0.48533
felbinac	0.166445	0.850421
torasemide	0.16865	0.603241
sisomicin	0.169655	0.306294
pyrazinamide	0.170555	0.258026
imidurea	0.171995	0.447507
pramocaine	0.173155	0.427934
altizide	0.174035	0.691426
imipenem	0.175805	0.280621
oxamniquine	0.17594	0.285151
Prestwick-1085	0.177315	0.146881
gemfibrozil	0.177805	0.138693
acetylsalicylsalicylic acid	0.178095	0.153598
doxazosin	0.17813	0.938855
nipecotic acid	0.17929	0.0634397
levothyroxine sodium	0.179355	0.0443078
Trolox C	0.179395	0.181195
drofenine	0.179595	0.196056
methoxsalen	0.180525	0.0455694
methoxamine	0.180865	0.157082
tranylcypromine	0.181355	0.0705934
ciclacillin	0.18197	0.0793169
dobutamine	0.18269	0.119018
benfotiamine	0.183915	0.0429163
dorzolamide	0.18395	0.0516703
amphotericin B	0.184045	0.0205878
tiapride	0.185935	0.0207482
cefotetan	0.18602	0.00827524
homosalate	0.186285	0.0283902
meclozine	0.186375	0.0697431
ethosuximide	0.186665	0.999975
ornidazole	0.186725	0.00901737
dosulepin	0.187315	0.113874
palmatine	0.188335	0.782196
leflunomide	0.189045	0.0168084
corbadrine	0.1895	0.0235083
mesoridazine	0.190535	0.0251906
iopanoic acid	0.191035	0.010176
amoxicillin	0.19119	0.0449265
propafenone	0.191205	0.98542
dihydroergotamine	0.191405	0.0247661
spiradoline	0.192315	0.109676
hexetidine	0.192375	0.00926884
iobenguane	0.192675	0.00703222
orphenadrine	0.193275	0.00488697
levcycloserine	0.19399	0.00938091
meprylcaine	0.19424	0.00732437
colecalciferol	0.19526	0.0821194
carisoprodol	0.195375	0.005486
bromocriptine	0.195445	0.105995
carcinine	0.19577	0.00420209
dexibuprofen	0.197005	0.00150903
chlorcyclizine	0.19772	0.00903327
santonin	0.19786	0.0133539
retrorsine	0.198225	0.0304942
benzthiazide	0.19843	0.00726734
isotretinoin	0.198755	0.0078343
phenacetin	0.198815	0.00336397
atropine methonitrate	0.19891	0.00880636
lasalocid	0.20023	0.00816528
proxymetacaine	0.20158	0.00838561
meclofenamic acid	0.201645	0.000655146
betahistine	0.2023	0.00810584
fluvoxamine	0.20396	0.00323081
diperodon	0.20464	0.10673
dinoprost	0.20482	0.000788852
demecarium bromide	0.2049	0.000409429
Prestwick-864	0.204995	0.000328881
pivampicillin	0.206005	0.000420274
moroxydine	0.206805	9.90276e-05
alfuzosin	0.20712	0.00154745
labetalol	0.20737	0.0177174
kinetin	0.20773	0.0526617
phenelzine	0.20804	0.00588493
eticlopride	0.208255	7.31769e-05
sulfathiazole	0.208775	6.53436e-05
Prestwick-1084	0.208975	0.0479424
alpha-yohimbine	0.209835	0.000312799
cytochalasin B	0.21041	0.00773194
maprotiline	0.210615	0.0026924
AG-012559	0.212825	0.0560578
benzamil	0.21311	0.000441779
(-)-MK-801	0.21336	0.0038298
fenoterol	0.213495	0.00022071
procarbazine	0.213725	0.000476677
chlorprothixene	0.213785	0.00137065
quinisocaine	0.2151	0.00147802
idoxuridine	0.21552	6.07994e-05
sulfapyridine	0.215745	0.02044
clobetasol	0.216265	0.0536346
S-propranolol	0.216315	0.000204625
tacrine	0.216475	0.00496746
alprostadil	0.217275	0.00290137
methylergometrine	0.220325	0.000147502
pronetalol	0.22094	9.52977e-05
SB-203580	0.22095	0.00303616
Gly-His-Lys	0.222165	0.909038
valdecoxib	0.223035	0.425854
zardaverine	0.22488	0.000280374
loperamide	0.22555	0.0235674
(-)-isoprenaline	0.22733	0.000105456
AG-028671	0.22829	0.340103
Prestwick-983	0.22903	5.75316e-05
clomifene	0.22919	0.440652
benfluorex	0.22964	0.000165199
amodiaquine	0.23002	5.17665e-05
CP-690334-01	0.23055	0.000454109
colchicine	0.2308	5.44437e-05
fluspirilene	0.231165	0.00390299
5186223	0.231415	0.00793538
(+)-chelidonine	0.23153	0.00197598
sulmazole	0.23156	0.0308927
carmustine	0.23304	0.352485
molindone	0.234625	0.000157361
fulvestrant	0.23542	0.00169642
clofazimine	0.23642	0.000748863
protriptyline	0.23679	0.00261716
etoposide	0.237865	0.000591345
metixene	0.23909	5.27662e-05
tetryzoline	0.239505	0.00106373
chlorpromazine	0.23976	0.0060095
hyoscyamine	0.24072	0.00959266
pyrantel	0.241945	0.000332382
clozapine	0.24198	0.000182122
gramine	0.242245	5.86328e-05
cloperastine	0.244065	0.0347946
clofilium tosylate	0.245015	5.16504e-05
hycanthone	0.24656	5.25078e-05
dicycloverine	0.24657	0.000175803
benzethonium chloride	0.248045	0.000636627
oxolinic acid	0.250575	5.04641e-05
AR-A014418	0.2506	0.0325103
bepridil	0.25338	0.003529
5109870	0.254725	0.176509
valinomycin	0.257925	0.00074199
ambroxol	0.263175	5.13478e-05
trihexyphenidyl	0.26325	0.000151578
prenylamine	0.26351	5.80699e-05
meptazinol	0.264435	0.000130244
mefloquine	0.26712	6.81778e-05
alpha-ergocryptine	0.267575	5.30098e-05
Prestwick-1080	0.267725	0.000229104
etacrynic acid	0.267745	0.000828683
perhexiline	0.270795	0.000245002
gossypol	0.27114	0.00182208
prochlorperazine	0.271925	5.24945e-05
withaferin A	0.274745	5.29525e-05
rifabutin	0.27517	0.00018914
SC-560	0.27536	0.00307614
NS-398	0.27679	0.0002105
thiostrepton	0.277545	0.000271587
terfenadine	0.281755	5.07742e-05
tonzonium bromide	0.28391	8.77254e-05
pyrvinium	0.28889	0.000162952
securinine	0.290285	7.50037e-05
alvespimycin	0.292505	5.2079e-05
monorden	0.2926	4.88554e-05
thapsigargin	0.292615	0.00187168
bisacodyl	0.2942	0.000283703
celastrol	0.296775	0.00026844
MG-132	0.29732	0.000226315
tanespimycin	0.30233	7.02873e-05
mepacrine	0.30267	0.000103855
piperlongumine	0.303065	4.96546e-05
parthenolide	0.30319	8.09583e-05
15-delta prostaglandin J2	0.305105	6.06013e-05
0297417-0002B	0.30944	0.00559296
geldanamycin	0.31145	5.40377e-05
thioridazine	0.3145	0.000314185
niclosamide	0.315435	5.27987e-05
MG-262	0.31706	0.00467658
strophanthidin	0.320865	8.23901e-05
LY-294002	0.32266	9.35281e-05
scriptaid	0.327155	0.000364916
emetine	0.33635	0.000152249
cephaeline	0.338805	0.000318916
lycorine	0.339645	5.99728e-05
cicloheximide	0.346835	6.92379e-05
digoxigenin	0.353945	0.000144816
digitoxigenin	0.35437	0.00140643
PHA-00816795	0.354455	0.947926
puromycin	0.36108	4.88407e-05
ouabain	0.364675	0.000430242
helveticoside	0.36833	0.000220517
proscillaridin	0.370145	0.000388797
digoxin	0.370495	0.000304937
lanatoside C	0.383495	0.000216441
anisomycin	0.396775	7.01318e-05
W-13	0.749255	0.222972
