# Supplementary material for: Therapeutic Targeting of the Premetastatic Stage in Human Lung-to-Brain Metastasis
Source: Oxford University Press journal article supplement (doi:10.1158/0008-5472.can-18-1022), 2018-07-09
Supplement: 00085472can181022-sup-199669_2_supp_4846292_pjqlp5.xlsx [file 00085472can181022-sup-199669_2_supp_4846292_pjqlp5.xlsx]

## Sheet: Sheet1
ENTREZID	SYMBOL	mean.logFC
72	ACTG2	10.6037
2892	GRIA3	10.3993
442213	PTCHD4	10.2594
1410	CRYAB	10.2483
5549	PRELP	10.1668
2252	FGF7	9.94085
2255	FGF10	9.92998
9241	NOG	9.65528
8340	HIST1H2BL	9.40207
1620	BRINP1	9.34575
432369	ATP5EP2	-9.2224
7544	ZFY	9.18905
58	ACTA1	9.17104
8287	USP9Y	9.16744
3351	HTR1B	9.12876
100463482	MTRNR2L6	9.08696
5099	PCDH7	9.05082
7472	WNT2	8.98599
2846	LPAR4	8.93228
8344	HIST1H2BE	8.89123
8420	SNHG3	-8.87736
70	ACTC1	8.79136
8332	HIST1H2AL	8.75518
4803	NGF	8.71609
627	BDNF	8.70699
29923	HILPDA	-8.70649
100463487	MTRNR2L9	8.69563
140801	RPL10L	8.69285
5648	MASP1	8.67009
23768	FLRT2	8.66074
25817	FAM19A5	8.62303
2899	GRIK3	8.61833
100463488	MTRNR2L10	8.60226
2701	GJA4	8.56172
10814	CPLX2	8.5588
1829	DSG2	-8.54634
388135	C15orf59	8.51251
1075	CTSC	-8.4994
1611	DAP	-8.48673
690	BTF3P11	8.47539
23532	PRAME	-8.44834
6511	SLC1A6	8.44441
728945	PPIAL4F	8.43724
3281	HSBP1	-8.41839
54801	HAUS6	-8.41542
57689	LRRC4C	8.31865
8345	HIST1H2BH	8.31322
85441	HELZ2	-8.30263
7021	TFAP2B	8.29699
1295	COL8A1	8.25154
10468	FST	8.24733
64426	SUDS3	-8.23503
23175	LPIN1	-8.23099
59	ACTA2	8.22476
9452	ITM2A	8.19492
374986	FAM73A	-8.14479
54741	LEPROT	-8.13574
3659	IRF1	-8.12613
79717	PPCS	-8.12595
57526	PCDH19	8.1177
51253	MRPL37	-8.11425
3135	HLA-G	8.10494
3984	LIMK1	-8.08532
51691	LSM8	-8.07848
1734	DIO2	8.07736
653598	PPIAL4C	8.05829
151354	FAM84A	8.05351
126731	CCSAP	-8.04449
286495	TTC3P1	-8.03933
2263	FGFR2	8.0317
23107	MRPS27	-8.02535
8930	MBD4	-8.02014
26284	ERAL1	-8.01236
54499	TMCO1	-8.00718
360155	CYCSP52	8.00471
56882	CDC42SE1	-7.97728
57585	CRAMP1	-7.97632
100128627	CDC42P3	7.97039
64388	GREM2	7.95748
1676	DFFA	-7.95295
23645	PPP1R15A	-7.95018
6309	SC5D	-7.93805
3316	HSPB2	7.93136
56660	KCNK12	7.92686
6326	SCN2A	7.92408
2901	GRIK5	7.88505
161725	OTUD7A	7.88095
5905	RANGAP1	-7.87715
29942	PURG	7.8593
51715	RAB23	-7.85825
9189	ZBED1	-7.85506
55165	CEP55	-7.84698
10473	HMGN4	-7.84243
84894	LINGO1	7.84192
150275	CCDC117	-7.83252
55038	CDCA4	-7.78898
11091	WDR5	-7.78702
3597	IL13RA1	-7.77618
58986	TMEM8A	-7.76514
653604	HIST2H3D	7.75154
7545	ZIC1	7.74997
139411	PTCHD1	7.74199
113178	SCAMP4	-7.71646
90861	HN1L	-7.70848
7546	ZIC2	7.70823
1960	EGR3	7.70554
2303	FOXC2	7.70452
1155	TBCB	-7.69847
8566	PDXK	-7.69833
5232	PGK2	7.69773
64781	CERK	-7.66932
114932	MRFAP1L1	-7.66774
100302285	MIR1244-1	7.66586
116151	FAM210B	-7.66377
8804	CREG1	-7.65414
9353	SLIT2	7.64993
5819	PVRL2	-7.64907
29086	BABAM1	-7.6431
5355	PLP2	-7.63378
388662	SLC6A17	7.62957
26286	ARFGAP3	-7.62868
728773	PABPC1P2	7.61621
8542	APOL1	-7.60901
2059	EPS8	-7.60528
9801	MRPL19	-7.59892
51497	NELFCD	-7.59674
308	ANXA5	-7.59658
101927075	FGF10-AS1	7.58722
57212	TP73-AS1	-7.58319
162466	PHOSPHO1	7.58074
644591	PPIAL4G	7.57931
729080	LOC729080	7.57701
55769	ZNF83	-7.57694
7520	XRCC5	-7.56718
283635	FAM177A1	-7.56669
266743	NPAS4	7.56454
9148	NEURL1	7.56324
29058	TMEM230	-7.55692
29127	RACGAP1	-7.55597
56990	CDC42SE2	-7.5509
8331	HIST1H2AJ	7.55062
63910	SLC17A9	-7.55039
10314	LANCL1	-7.54851
100133941	CD24	-7.54771
5010	CLDN11	-7.5428
55075	UACA	-7.53788
8348	HIST1H2BO	7.53513
1004	CDH6	7.5263
4101	MAGEA2	-7.52231
6992	PPP1R11	-7.51207
11031	RAB31	-7.50972
65982	ZSCAN18	-7.50814
285672	SREK1IP1	-7.49688
54458	PRR13	-7.49669
440695	ETV3L	7.49098
4793	NFKBIB	-7.48963
4357	MPST	-7.47743
57185	NIPAL3	-7.46651
28962	OSTM1	-7.46501
51474	LIMA1	-7.45465
223	ALDH9A1	-7.44498
3490	IGFBP7	7.44275
51567	TDP2	-7.44151
51300	TIMMDC1	-7.43712
100507246	SNHG16	-7.42228
10656	KHDRBS3	7.4189
10066	SCAMP2	-7.41005
135114	HINT3	-7.37459
8291	DYSF	7.37339
25792	CIZ1	-7.37184
9843	HEPH	7.37091
6949	TCOF1	-7.36987
51596	CUTA	-7.36888
65265	C8orf33	-7.36773
116841	SNAP47	-7.36689
10488	CREB3	-7.36633
8338	HIST2H2AC	7.36625
9379	NRXN2	7.35574
23642	SNHG1	-7.3456
8854	ALDH1A2	7.33829
2045	EPHA7	7.33099
6876	TAGLN	7.32498
2733	GLE1	-7.31934
3356	HTR2A	7.2893
133418	EMB	-7.288
1337	COX6A1	-7.28426
60488	MRPS35	-7.2762
5465	PPARA	-7.27596
2936	GSR	-7.27092
85416	ZIC5	7.26686
6236	RRAD	-7.26516
79073	TMEM109	-7.2648
65979	PHACTR4	-7.26011
4705	NDUFA10	-7.25662
51203	NUSAP1	-7.25366
84293	FAM213A	-7.25305
55355	HJURP	-7.25261
26092	TOR1AIP1	-7.25141
8341	HIST1H2BN	7.25045
54329	GPR85	7.247
5876	RABGGTB	-7.24201
5434	POLR2E	-7.23021
1717	DHCR7	-7.22922
102465432	MIR6723	-7.22505
9592	IER2	-7.22151
51144	HSD17B12	-7.22139
51512	GTSE1	-7.21887
83986	FAM234A	-7.21657
26156	RSL1D1	-7.21267
389792	IER5L	7.21221
4139	MARK1	7.20694
54998	AURKAIP1	-7.2009
55037	PTCD3	-7.19657
5696	PSMB8	-7.19172
148362	BROX	-7.19002
28977	MRPL42	-7.18954
83786	FRMD8	-7.18816
81875	ISG20L2	-7.18503
10782	ZNF274	-7.17948
8294	HIST1H4I	7.17496
10410	IFITM3	-7.17284
157247	MGC27345	-7.17284
1009	CDH11	7.17235
729739	LOC729739	7.16105
51507	RTFDC1	-7.15067
983	CDK1	-7.15064
148206	ZNF714	-7.14868
92126	DSEL	7.14761
57226	LYRM2	-7.14492
51759	C9orf78	-7.14441
89781	HPS4	-7.14413
54460	MRPS21	-7.14245
26608	TBL2	-7.14234
130574	LYPD6	-7.13962
6282	S100A11	-7.13717
22818	COPZ1	-7.13655
29997	GLTSCR2	-7.13577
8050	PDHX	-7.13325
23784	POTEH	7.13314
29777	ABT1	-7.12771
79980	DSN1	-7.1246
54918	CMTM6	-7.11891
9647	PPM1F	-7.11872
89958	SAPCD2	-7.11644
10935	PRDX3	-7.1164
27065	NSG1	7.11435
4916	NTRK3	7.1114
55002	TMCO3	-7.11108
25870	SUMF2	-7.11037
93974	ATPIF1	-7.10634
284459	HKR1	-7.10283
340529	PABPC1L2A	7.10241
1026	CDKN1A	-7.10165
3747	KCNC2	7.0973
10946	SF3A3	-7.09459
55973	BCAP29	-7.09019
6444	SGCD	7.08962
348235	SKA2	-7.08828
644815	FAM83G	-7.08327
6341	SCO1	-7.08187
5101	PCDH9	7.08073
10094	ARPC3	-7.07945
23660	ZKSCAN5	-7.07488
4111	MAGEA12	-7.06987
23384	SPECC1L	-7.06855
93380	MMGT1	-7.06844
8653	DDX3Y	7.06841
100132247	NPIPB5	-7.06367
6443	SGCB	-7.06241
51187	RSL24D1	-7.06114
55699	IARS2	-7.05978
57696	DDX55	-7.05684
440311	LOC440311	-7.05587
643246	MAP1LC3B2	-7.05526
2356	FPGS	-7.05114
122553	TRAPPC6B	-7.05101
23076	RRP1B	-7.04513
54876	DCAF16	-7.0447
9620	CELSR1	-7.04393
54733	SLC35F2	-7.03873
130497	OSR1	7.03825
6449	SGTA	-7.03473
83871	RAB34	-7.02195
84809	CROCCP2	-7.02049
8629	JRK	-7.02014
10659	CELF2	7.01993
55739	CARKD	-7.0188
88745	RRP36	-7.01543
55163	PNPO	-7.01513
55333	SYNJ2BP	-7.01392
7132	TNFRSF1A	-7.01165
23671	TMEFF2	7.0094
2000	ELF4	-6.99963
259266	ASPM	-6.99674
10682	EBP	-6.99284
22863	ATG14	-6.98805
64856	VWA1	-6.98684
2635	GBP3	-6.98681
100462981	MTRNR2L2	6.9866
9322	TRIP10	-6.98626
80700	UBXN6	-6.98569
57693	ZNF317	-6.98413
79901	CYBRD1	-6.98257
55142	HAUS2	-6.97601
51522	TMEM14C	-6.96756
57711	ZNF529	-6.96405
4240	MFGE8	-6.9583
55157	DARS2	-6.95476
389136	VGLL3	6.95452
158293	FAM120AOS	-6.94845
10186	LHFP	6.94753
158158	RASEF	-6.94672
5243	ABCB1	6.94567
401152	C4orf3	-6.94512
9570	GOSR2	-6.94301
83695	RHNO1	-6.94215
57456	KIAA1143	-6.93542
55670	PEX26	-6.92838
5613	PRKX	-6.9273
4193	MDM2	-6.9237
54434	SSH1	-6.92338
57692	MAGEE1	6.91954
93100	NAPRT	-6.91875
56683	C21orf59	-6.91436
440689	HIST2H2BF	6.91328
200014	CC2D1B	-6.91028
23370	ARHGEF18	-6.91021
5899	RALB	-6.91019
79035	NABP2	-6.90063
7080	NKX2-1	-6.89799
83699	SH3BGRL2	-6.8979
26259	FBXW8	-6.89439
10969	EBNA1BP2	-6.89108
116068	LYSMD3	-6.89055
114826	SMYD4	-6.88808
55785	FGD6	-6.88754
8266	UBL4A	-6.8797
2289	FKBP5	-6.87427
4163	MCC	-6.87396
51427	ZNF107	-6.8729
63875	MRPL17	-6.87249
23759	PPIL2	-6.8702
379025	PSMA3-AS1	-6.86755
9587	MAD2L1BP	-6.85759
1534	CYB561	-6.85746
5456	POU3F4	6.84835
54545	MTMR12	-6.84816
201292	TRIM65	-6.84368
63901	FAM111A	-6.84114
3588	IL10RB	-6.83903
59345	GNB4	-6.83841
9117	SEC22C	-6.83595
90417	KNSTRN	-6.83494
6713	SQLE	-6.83015
84981	MIR22HG	-6.8296
10016	PDCD6	-6.82283
4325	MMP16	6.8218
26960	NBEA	6.81902
4710	NDUFB4	-6.81627
26045	LRRTM2	6.81226
4061	LY6E	-6.80901
2977	GUCY1A2	6.80793
83956	RACGAP1P	-6.80198
57602	USP36	-6.79642
79039	DDX54	-6.79557
64112	MOAP1	-6.79469
11075	STMN2	6.79278
57050	UTP3	-6.79235
9526	MPDU1	-6.79086
7388	UQCRH	-6.7888
4883	NPR3	6.78838
50486	G0S2	-6.77911
117178	SSX2IP	-6.7781
51012	PRELID3B	-6.77711
55783	CMTR2	-6.77299
5810	RAD1	-6.771
80273	GRPEL1	-6.77085
23353	SUN1	-6.7708
29886	SNX8	-6.77011
4858	NOVA2	6.76691
100132815	IPO5P1	-6.76435
59353	TMEM35	6.7637
79017	GGCT	-6.76252
3094	HINT1	-6.76046
7011	TEP1	-6.76025
55316	RSAD1	-6.7501
51116	MRPS2	-6.74828
84498	FAM120B	-6.74813
23420	NOMO1	-6.74618
401010	LOC401010	-6.74528
7374	UNG	-6.74392
100287171	WASH1	-6.74369
994	CDC25B	-6.7424
25797	QPCT	-6.74201
4191	MDH2	-6.74033
79581	SLC52A2	-6.73936
93487	MAPK1IP1L	-6.73926
116983	ACAP3	-6.73885
56997	ADCK3	-6.73796
293	SLC25A6	-6.73732
90480	GADD45GIP1	-6.73684
11120	BTN2A1	-6.73516
57546	PDP2	-6.73503
402483	LINC01000	-6.73487
2581	GALC	-6.73241
80020	FOXRED2	-6.72827
10507	SEMA4D	-6.72086
80031	SEMA6D	6.7202
9045	RPL14	-6.71757
7464	CORO2A	-6.71562
23625	FAM89B	-6.71501
91056	AP5B1	-6.71432
22980	TCF25	-6.71305
166	AES	-6.71295
373156	GSTK1	-6.71094
8555	CDC14B	-6.70788
196463	PLBD2	-6.70473
3754	KCNF1	6.70245
56853	CELF4	6.70228
10544	PROCR	-6.69913
63933	MCUR1	-6.69825
3612	IMPA1	-6.69655
282809	POC1B	-6.69301
25802	LMOD1	6.69106
100507436	MICA	-6.68978
4105	MAGEA6	-6.68939
9733	SART3	-6.68788
79155	TNIP2	-6.68761
55621	TRMT1	-6.6873
100462977	MTRNR2L1	6.68648
129138	ANKRD54	-6.68599
54858	PGPEP1	-6.68436
9328	GTF3C5	-6.68367
826	CAPNS1	-6.68357
221035	REEP3	-6.68027
127253	TYW3	-6.68001
64802	NMNAT1	-6.67821
84262	PSMG3	-6.67606
51649	MRPS23	-6.67318
8346	HIST1H2BI	6.66496
22861	NLRP1	-6.66478
8722	CTSF	-6.66462
221710	SMIM13	-6.66263
10741	RBBP9	-6.66195
64427	TTC31	-6.65934
55893	ZNF395	-6.65802
283742	FAM98B	-6.65539
5986	RFNG	-6.6539
10007	GNPDA1	-6.65006
728661	SLC35E2B	-6.64719
5592	PRKG1	6.64713
56852	RAD18	-6.64275
11248	NXPH3	6.64068
2824	GPM6B	6.63936
56648	EIF5A2	-6.63842
4043	LRPAP1	-6.63751
54953	C1orf27	-6.63738
10151	HNRNPA3P1	6.63205
1802	DPH2	-6.63202
84516	DCTN5	-6.62779
6919	TCEA2	-6.62739
90293	KLHL13	6.62583
729082	OIP5-AS1	-6.62564
10308	ZNF267	-6.62278
7345	UCHL1	-6.62109
83858	ATAD3B	-6.62107
8518	IKBKAP	-6.61338
1063	CENPF	-6.61249
169714	QSOX2	-6.61193
654466	KGFLP2	6.61114
23225	NUP210	-6.6084
83666	PARP9	-6.60542
390916	NUDT19	-6.60492
653820	FAM72B	-6.60321
5396	PRRX1	6.60245
1471	CST3	-6.59936
10447	FAM3C	-6.59867
51280	GOLM1	-6.59685
84107	ZIC4	6.59616
10795	ZNF268	-6.59549
347862	PDDC1	-6.59461
55526	DHTKD1	-6.59371
1602	DACH1	6.59312
57820	CCNB1IP1	-6.59033
163859	SDE2	-6.5889
84436	ZNF528	-6.5888
6790	AURKA	-6.58738
5880	RAC2	-6.58603
3428	IFI16	-6.58588
11222	MRPL3	-6.58303
8263	F8A1	-6.5822
2739	GLO1	-6.58161
56647	BCCIP	-6.58008
84967	LSM10	-6.57985
1397	CRIP2	-6.57834
3479	IGF1	6.57501
1429	CRYZ	-6.57201
25987	TSKU	-6.57075
285268	ZNF621	-6.56756
4796	TONSL	-6.5663
84248	FYTTD1	-6.56552
253635	GPATCH11	-6.56552
23042	PDXDC1	-6.56333
220906	WAC-AS1	-6.56143
26039	SS18L1	-6.55946
9341	VAMP3	-6.55907
170960	ZNF721	-6.55748
90459	ERI1	-6.55491
862	RUNX1T1	6.55446
348995	NUP43	-6.55421
80233	FAAP100	-6.55419
26017	FAM32A	-6.55269
9851	KIAA0753	-6.55148
387263	C6orf120	-6.55133
3833	KIFC1	-6.54995
56979	PRDM9	6.5488
100499466	LINC00674	-6.54333
1663	DDX11	-6.54327
65080	MRPL44	-6.54198
6482	ST3GAL1	-6.54156
2668	GDNF	6.53939
57563	KLHL8	-6.52821
64506	CPEB1	6.52641
10380	BPNT1	-6.5233
9885	OSBPL2	-6.52311
53834	FGFRL1	-6.52146
1241	LTB4R	-6.52035
6596	HLTF	-6.51815
7152	TOP1P2	6.51747
440567	UQCRHL	-6.51514
387521	TMEM189	-6.51276
26503	SLC17A5	-6.50842
8362	HIST1H4K	6.50668
25800	SLC39A6	-6.50667
284001	CCDC57	-6.50629
339044	PKD1P1	-6.50531
100499177	THAP9-AS1	-6.50472
5055	SERPINB2	6.50384
79921	TCEAL4	-6.50321
9812	KIAA0141	-6.50016
7699	ZNF140	-6.49991
55958	KLHL9	6.49843
151636	DTX3L	-6.49553
92610	TIFA	-6.49518
340252	ZNF680	-6.49474
1163	CKS1B	-6.49385
1876	E2F6	-6.4913
8417	STX7	-6.4904
4135	MAP6	6.48863
10572	SIVA1	-6.48802
54207	KCNK10	6.48747
64430	PCNXL4	-6.48719
3988	LIPA	-6.48635
875	CBS	-6.48197
34	ACADM	-6.47957
54840	APTX	-6.47712
55723	ASF1B	-6.47676
199953	TMEM201	-6.47592
374393	FAM111B	-6.47477
332	BIRC5	-6.47432
150776	LOC150776	-6.47363
51124	IER3IP1	-6.4727
4921	DDR2	6.46927
134147	CMBL	-6.46923
9875	URB1	-6.46896
6882	TAF11	-6.46805
64094	SMOC2	6.46779
51018	RRP15	-6.46352
10024	TROAP	-6.46293
6813	STXBP2	-6.46191
8914	TIMELESS	-6.45594
64755	C16orf58	-6.45313
4091	SMAD6	6.45146
60674	GAS5	-6.45075
6791	AURKAPS1	-6.45057
100129034	LOC100129034	-6.44954
57819	LSM2	-6.44922
254263	CNIH2	6.44848
22933	SIRT2	-6.44718
55320	MIS18BP1	-6.44597
6804	STX1A	-6.44394
125228	FAM210A	-6.44306
57136	APMAP	-6.44241
10744	PTTG2	-6.44021
23514	SPIDR	-6.43773
55270	NUDT15	-6.4367
4071	TM4SF1	-6.43406
1312	COMT	-6.4335
27346	TMEM97	-6.43271
202	AIM1	-6.43039
646762	LOC646762	-6.42977
80212	CCDC92	-6.42946
23585	TMEM50A	-6.42879
80023	NRSN2	-6.42862
64431	ACTR6	-6.42781
8363	HIST1H4J	6.42692
29080	CCDC59	-6.42665
28973	MRPS18B	-6.42413
9516	LITAF	-6.42213
729515	TMEM242	-6.42109
727957	MROH1	-6.42067
5018	OXA1L	-6.41973
337867	UBAC2	-6.41965
9060	PAPSS2	-6.41624
340554	ZC3H12B	6.41555
64093	SMOC1	6.41408
25917	THUMPD3	-6.41193
64968	MRPS6	-6.41017
57221	ARFGEF3	-6.40952
553115	PEF1	-6.40596
64425	POLR1E	-6.40441
84002	B3GNT5	-6.4042
373863	DND1	-6.40359
26059	ERC2	6.40325
57506	MAVS	-6.40242
317781	DDX51	-6.40191
51293	CD320	-6.40174
26469	PTPN18	-6.40065
9919	SEC16A	-6.39881
54811	ZNF562	-6.39856
374378	GALNT18	6.39791
165	AEBP1	6.39634
343069	HNRNPCL1	6.39272
7559	ZNF12	-6.3918
127703	C1orf216	-6.39168
728841	NBPF8	-6.39146
54906	FAM208B	-6.38813
10906	TRAFD1	-6.38813
7517	XRCC3	-6.38604
3977	LIFR	-6.38291
203427	SLC25A43	-6.38263
337876	CHSY3	6.38256
64114	TMBIM1	-6.38167
5371	PML	-6.38031
57647	DHX37	-6.37877
168667	BMPER	6.37874
55784	MCTP2	-6.37849
4277	MICB	-6.37739
55312	RFK	-6.37706
2218	FKTN	-6.37695
55862	ECHDC1	-6.37684
128312	HIST3H2BB	6.37586
56731	SLC2A4RG	-6.37376
129642	MBOAT2	-6.37319
3712	IVD	-6.3728
25847	ANAPC13	-6.3716
285381	DPH3	-6.37054
64343	AZI2	-6.37019
84056	KATNAL1	-6.36985
9469	CHST3	-6.3636
26995	TRUB2	-6.36124
9532	BAG2	-6.35715
2967	GTF2H3	-6.35579
6374	CXCL5	-6.35569
6853	SYN1	6.35279
26470	SEZ6L2	-6.35229
89891	WDR34	-6.3518
51263	MRPL30	-6.34904
2290	FOXG1	6.34852
64110	MAGEF1	-6.34767
196	AHR	-6.34722
223082	ZNRF2	-6.34573
51388	NIP7	-6.3432
3084	NRG1	6.34301
3875	KRT18	-6.34296
6141	RPL18	-6.33621
4725	NDUFS5	-6.33612
55245	UQCC1	-6.33554
7481	WNT11	6.33443
25896	INTS7	-6.33403
326625	MMAB	-6.33379
26071	FAM127B	-6.33129
220134	SKA1	-6.3308
6092	ROBO2	6.32982
29057	FAM156A	-6.32921
93134	ZNF561	-6.32865
55765	C1orf106	-6.32681
664618	HSP90AB4P	6.32568
54902	TTC19	-6.32567
79083	MLPH	-6.32382
10105	PPIF	-6.32378
56951	C5orf15	-6.32332
84317	CCDC115	-6.32327
54908	SPDL1	-6.32135
55422	ZNF331	-6.32021
4102	MAGEA3	-6.31982
27350	APOBEC3C	-6.31943
57007	ACKR3	6.31892
9342	SNAP29	-6.31787
147	ADRA1B	6.31593
2334	AFF2	6.31578
139322	APOOL	-6.31573
6195	RPS6KA1	-6.3115
5538	PPT1	-6.30837
91582	RPS19BP1	-6.30804
6646	SOAT1	-6.3068
55268	ECHDC2	-6.3049
89941	RHOT2	-6.30409
124923	SGK494	-6.30272
27075	TSPAN13	-6.30043
6619	SNAPC3	-6.2961
252839	TMEM9	-6.28911
84918	LRP11	-6.28858
10555	AGPAT2	-6.28724
51645	PPIL1	-6.2856
2713	GK3P	6.28504
23379	ICE1	-6.28367
9883	POM121	-6.28299
400818	NBPF9	-6.28245
10923	SUB1	-6.28161
9096	TBX18	6.28082
6391	SDHC	-6.28081
93622	LOC93622	-6.27848
302	ANXA2	-6.27825
4267	CD99	-6.27663
51449	PCYOX1	-6.27633
645974	PABPC1L2B	6.27535
3949	LDLR	-6.27509
150468	CKAP2L	-6.2736
26147	PHF19	-6.27192
8237	USP11	-6.27166
9150	CTDP1	-6.27129
150223	YDJC	-6.27068
55228	PNMAL1	-6.27064
4293	MAP3K9	-6.26939
5571	PRKAG1	-6.26845
9238	TBRG4	-6.26842
7581	ZNF33A	-6.26783
10892	MALT1	-6.26778
10439	OLFM1	6.26737
1674	DES	6.26733
112770	GLMP	-6.26495
84986	ARHGAP19	-6.26452
83606	GUCD1	-6.26126
5627	PROS1	-6.26081
6235	RPS29	-6.25983
9422	ZNF264	-6.25789
22868	FASTKD2	-6.25788
79693	YRDC	-6.25711
412	STS	-6.25711
51510	CHMP5	-6.25692
79415	C17orf62	-6.25606
5442	POLRMT	-6.25491
8906	AP1G2	-6.25343
1374	CPT1A	-6.25329
126961	HIST2H3C	6.25329
440193	CCDC88C	-6.25185
55071	C9orf40	-6.24845
55751	TMEM184C	-6.24753
8195	MKKS	-6.24454
1497	CTNS	-6.24434
586	BCAT1	-6.24341
7644	ZNF91	-6.24258
9388	LIPG	-6.24135
79877	DCAKD	-6.23977
55253	TYW1	-6.23972
79048	SECISBP2	-6.2378
9839	ZEB2	6.2329
148022	TICAM1	-6.23131
54532	USP53	-6.23103
647087	C7orf73	-6.23024
149297	FAM78B	6.23015
701	BUB1B	-6.22935
5774	PTPN3	-6.22666
55813	UTP6	-6.22602
51122	COMMD2	-6.22367
58486	ZBED5	-6.22341
7706	TRIM25	-6.22325
55839	CENPN	-6.22279
9525	VPS4B	-6.2227
23155	CLCC1	-6.22225
8227	AKAP17A	-6.22133
1894	ECT2	-6.21802
55048	VPS37C	-6.21754
529	ATP6V1E1	-6.21738
23015	GOLGA8A	-6.21307
9738	CCP110	-6.21299
50861	STMN3	-6.20801
2300	FOXL1	6.20468
54939	COMMD4	-6.20396
8913	CACNA1G	6.1995
8436	SDPR	6.19818
81572	PDRG1	-6.19744
55151	TMEM38B	-6.19522
6607	SMN2	-6.19496
2631	GBAS	-6.19144
9858	PPP1R26	-6.18924
9686	VGLL4	-6.18905
6621	SNAPC4	-6.18719
22875	ENPP4	-6.18702
27292	DIMT1	-6.18582
65991	FUNDC2	-6.1857
81555	YIPF5	-6.18526
100505881	MAGI2-AS3	-6.18442
7035	TFPI	-6.18231
716	C1S	-6.18086
100506033	PTOV1-AS1	-6.17968
8209	C21orf33	-6.17792
5332	PLCB4	6.17729
57552	NCEH1	-6.17569
2296	FOXC1	6.17294
9731	CEP104	-6.17249
90407	TMEM41A	-6.17005
11079	RER1	-6.16898
2920	CXCL2	-6.16701
11101	ATE1	-6.16512
775	CACNA1C	6.1641
51535	PPHLN1	-6.16283
27089	UQCRQ	-6.16245
10460	TACC3	-6.16164
9636	ISG15	-6.1606
26826	RNU6-6P	6.15902
54899	PXK	-6.15883
11040	PIM2	-6.15683
23177	CEP68	-6.15127
90321	ZNF766	-6.14929
513	ATP5D	-6.14668
29796	UQCR10	-6.14658
65124	SOWAHC	-6.14631
8774	NAPG	-6.1462
79038	ZFYVE21	-6.14582
23169	SLC35D1	-6.1428
284232	ANKRD20A9P	6.14106
5097	PCDH1	6.14077
6547	SLC8A3	6.13993
116443	GRIN3A	6.13856
5366	PMAIP1	-6.13742
64761	PARP12	-6.13519
10807	SDCCAG3	-6.1349
10763	NES	-6.13469
1501	CTNND2	6.13252
54535	CCHCR1	-6.12987
4094	MAF	6.127
57189	KIAA1147	-6.12585
9240	PNMA1	-6.12564
5269	SERPINB6	-6.12453
51629	SLC25A39	-6.12081
10714	POLD3	-6.12072
9746	CLSTN3	-6.12017
3661	IRF3	-6.11917
55959	SULF2	6.11871
51118	UTP11L	-6.11745
29946	SERTAD3	-6.11633
389941	C1QL3	6.11431
154796	AMOT	6.11353
8226	PUDP	-6.11329
699	BUB1	-6.11326
85415	RHPN2	-6.11286
11145	PLA2G16	-6.1107
7739	ZNF185	-6.11052
84289	ING5	-6.10689
3008	HIST1H1E	6.10614
23594	ORC6	-6.10598
4843	NOS2	6.10561
55249	YY1AP1	-6.1053
114905	C1QTNF7	6.10321
90268	OTULIN	-6.10315
284565	NBPF15	-6.10204
5425	POLD2	-6.10197
55635	DEPDC1	-6.09932
51155	HN1	-6.09795
25926	NOL11	-6.09789
578	BAK1	-6.09698
29090	TIMM21	-6.09609
5884	RAD17	-6.0953
51279	C1RL	-6.0945
91283	MSANTD3	-6.0945
7163	TPD52	-6.09438
57583	TMEM181	-6.09392
50854	C6orf48	-6.0929
55750	AGK	-6.09273
10723	SLC12A7	-6.09212
221927	BRAT1	-6.09211
11130	ZWINT	-6.08789
8225	GTPBP6	-6.0862
8336	HIST1H2AM	6.08609
57045	TWSG1	-6.08556
83461	CDCA3	-6.08554
5321	PLA2G4A	6.08255
79583	TMEM231	-6.08177
84705	GTPBP3	-6.0775
23475	QPRT	-6.07592
54892	NCAPG2	-6.07566
3598	IL13RA2	-6.07506
23144	ZC3H3	-6.07452
8514	KCNAB2	-6.07196
11320	MGAT4A	-6.071
8463	TEAD2	-6.06997
1287	COL4A5	6.06887
80162	ATHL1	-6.06866
23213	SULF1	6.06556
3835	KIF22	-6.06504
6207	RPS13	-6.06244
286451	YIPF6	-6.06221
10404	CPQ	6.06206
27158	NDOR1	-6.06029
9401	RECQL4	-6.05931
755	C21orf2	-6.05786
5993	RFX5	-6.05493
80298	MTERF2	-6.05477
51808	PHAX	-6.0535
64975	MRPL41	-6.0534
7775	ZNF232	-6.05301
51490	C9orf114	-6.05268
1959	EGR2	6.05232
204	AK2	-6.05184
84901	NFATC2IP	-6.05149
5116	PCNT	-6.05049
6594	SMARCA1	-6.05041
64432	MRPS25	-6.04846
3169	FOXA1	-6.04758
4864	NPC1	-6.04671
23404	EXOSC2	-6.04434
23234	DNAJC9	-6.04364
55748	CNDP2	-6.04307
23229	ARHGEF9	6.04205
163049	ZNF791	-6.04159
440465	BAIAP2-AS1	-6.04114
6491	STIL	-6.03906
8677	STX10	-6.03889
222236	NAPEPLD	-6.03613
55835	CENPJ	-6.03528
55775	TDP1	-6.03426
24138	IFIT5	-6.03396
55109	AGGF1	-6.03393
2043	EPHA4	6.0326
51569	UFM1	-6.03144
81542	TMX1	-6.0292
54537	FAM35A	-6.02811
26502	NARF	-6.02632
330	BIRC3	-6.02559
63939	FAM217B	-6.02242
80110	ZNF614	-6.02172
114822	RHPN1	-6.02134
9481	SLC25A27	-6.02069
3162	HMOX1	-6.02053
55744	COA1	-6.01768
81788	NUAK2	-6.0172
1604	CD55	-6.01532
55872	PBK	-6.01481
79691	QTRTD1	-6.01417
54848	ARHGEF38	6.01004
54968	TMEM70	-6.00977
90333	ZNF468	-6.00831
6618	SNAPC2	-6.00815
122704	MRPL52	-6.0043
9901	SRGAP3	6.00357
114800	CCDC85A	6.00344
55149	MTPAP	-6.00266
8408	ULK1	-6.00222
54862	CC2D1A	-6.00107
2919	CXCL1	-6.00003
5226	PGD	-5.99837
23111	SPG20	-5.99809
54784	ALKBH4	-5.9943
100287072	LOC100287072	5.99403
55344	PLCXD1	-5.99302
100505876	CEBPZOS	-5.99187
339175	METTL2A	-5.98931
6470	SHMT1	-5.9883
7099	TLR4	5.98705
84247	LDOC1L	-5.98563
10687	PNMA2	-5.9851
2671	GFER	-5.985
2188	FANCF	-5.98381
100288778	LOC100288778	-5.98222
515	ATP5F1	-5.98207
201725	C4orf46	-5.98163
3613	IMPA2	-5.98098
5357	PLS1	-5.98077
3437	IFIT3	-5.98057
55672	NBPF1	-5.97949
29085	PHPT1	-5.97934
27106	ARRDC2	-5.9782
9144	SYNGR2	-5.9769
1062	CENPE	-5.9757
84365	NIFK	-5.97527
4751	NEK2	-5.97382
10457	GPNMB	-5.97276
968	CD68	-5.97096
348	APOE	-5.97063
23479	ISCU	-5.97051
120103	SLC36A4	-5.96984
5817	PVR	-5.96958
5999	RGS4	5.9684
5998	RGS3	-5.96769
10486	CAP2	-5.96724
1967	EIF2B1	-5.96635
221830	TWISTNB	-5.96597
79590	MRPL24	-5.96292
402	ARL2	-5.96286
64897	C12orf43	-5.96277
9533	POLR1C	-5.96274
78992	YIPF2	-5.96264
23354	HAUS5	-5.96251
56905	C15orf39	-5.96064
5997	RGS2	-5.96002
100288637	LOC100288637	-5.95958
388564	TMEM238	5.95918
64792	IFT22	-5.95845
165918	RNF168	-5.95838
51634	RBMX2	-5.95744
23141	ANKLE2	-5.95629
10531	PITRM1	-5.95584
152137	CCDC50	-5.95334
54534	MRPL50	-5.95135
6773	STAT2	-5.95093
192286	HIGD2A	-5.94686
10569	SLU7	-5.94635
9098	USP6	5.94597
219285	SAMD9L	-5.94457
57158	JPH2	5.94448
653784	MZT2A	-5.94391
1058	CENPA	-5.93893
138716	RPP25L	-5.937
84277	DNAJC30	-5.93664
953	ENTPD1	-5.93385
359845	FAM101B	-5.93368
9527	GOSR1	-5.93366
54965	PIGX	-5.93335
100506428	CBR3-AS1	5.93031
9829	DNAJC6	-5.92951
100128164	LOC100128164	5.92912
7265	TTC1	-5.92814
85027	SMIM3	-5.92763
144404	TMEM120B	-5.92631
1879	EBF1	5.92239
54955	C1orf109	-5.92018
54516	MTRF1L	-5.91911
22950	SLC4A1AP	-5.91823
4929	NR4A2	5.91822
10026	PIGK	-5.918
7291	TWIST1	5.91782
84679	SLC9A7	-5.9167
9246	UBE2L6	-5.91517
127281	FAM213B	-5.91403
637	BID	-5.91379
9180	OSMR	-5.91336
196074	METTL15	-5.91325
84946	LTV1	-5.91214
113000	RPUSD1	-5.91194
284716	RIMKLA	-5.91017
389541	LAMTOR4	-5.90951
23786	BCL2L13	-5.90863
79738	BBS10	-5.90843
7105	TSPAN6	-5.90699
54749	EPDR1	-5.90686
1635	DCTD	-5.9061
55201	MAP1S	-5.90442
84987	COX14	-5.90413
4548	MTR	-5.90351
55225	RAVER2	-5.90311
29781	NCAPH2	-5.90277
56910	STARD7	-5.90258
4008	LMO7	-5.90252
401022	HAGLR	-5.90223
84310	C7orf50	-5.89998
401397	LINC00998	-5.89926
151246	SGOL2	-5.89925
25828	TXN2	-5.89883
644511	RPL13AP6	5.89648
5074	PAWR	-5.89616
79664	ICE2	-5.89563
51337	THEM6	-5.89538
55738	ARFGAP1	-5.89461
10926	DBF4	-5.89411
81532	MOB2	-5.89283
9415	FADS2	-5.89239
5433	POLR2D	-5.89224
8674	VAMP4	-5.89171
29089	UBE2T	-5.89129
8772	FADD	-5.89111
10101	NUBP2	-5.88732
8284	KDM5D	5.88689
157313	CDCA2	-5.8858
29968	PSAT1	-5.88513
375323	LHFPL4	5.88498
389203	SMIM20	-5.88217
54680	ZNHIT6	-5.88205
23231	SEL1L3	-5.87888
23743	BHMT2	-5.87821
65005	MRPL9	-5.87717
53373	TPCN1	-5.87649
2990	GUSB	-5.87612
4004	LMO1	5.87558
90987	ZNF251	-5.87546
90580	C19orf52	-5.8751
7587	ZNF37A	-5.87293
125058	TBC1D16	-5.87107
64772	ENGASE	-5.8706
64981	MRPL34	-5.87022
79616	CCNJL	-5.86979
6128	RPL6	-5.86829
23513	SCRIB	-5.86558
26277	TINF2	-5.86511
7576	ZNF28	-5.86384
100294145	LOC100294145	-5.8621
1719	DHFR	-5.86106
2861	GPR37	-5.86008
4629	MYH11	5.85828
89122	TRIM4	-5.85777
587	BCAT2	-5.85667
7637	ZNF84	-5.85615
51545	ZNF581	-5.85549
4047	LSS	-5.85284
55052	MRPL20	-5.8526
63898	SH2D4A	-5.85041
79776	ZFHX4	5.84975
9019	MPZL1	-5.84707
374882	TMEM205	-5.84705
100859930	HEIH	-5.84677
23031	MAST3	-5.84573
10994	ILVBL	-5.84517
55173	MRPS10	-5.84432
79745	CLIP4	-5.8431
28232	SLCO3A1	5.8427
414	ARSD	-5.84253
2307	FOXS1	5.84017
55198	APPL2	-5.83663
63922	CHTF18	-5.83594
83544	DNAL1	-5.83468
8933	FAM127A	-5.83322
2982	GUCY1A3	-5.8327
10573	MRPL28	-5.83258
644936	LOC644936	5.83254
134549	SHROOM1	-5.83108
81576	CCDC130	-5.83061
1350	COX7C	-5.82904
728392	LOC728392	-5.82856
54413	NLGN3	5.82726
246721	POLR2J2	-5.82667
147172	LRRC37BP1	-5.82449
63967	CLSPN	-5.82289
112840	WDR89	-5.82112
78994	PRR14	-5.81905
55970	GNG12	-5.81897
266655	LINC00094	-5.81637
2801	GOLGA2	-5.81594
1942	EFNA1	-5.814
169611	OLFML2A	-5.81335
85403	EAF1	-5.81333
55011	PIH1D1	-5.81331
7389	UROD	-5.81257
101410538	MMP24-AS1	-5.81218
2534	FYN	5.81164
6652	SORD	-5.80911
144501	KRT80	-5.80777
9130	FAM50A	-5.80401
23288	IQCE	-5.8036
79763	ISOC2	-5.80033
10084	PQBP1	-5.79876
55814	BDP1	-5.7982
9787	DLGAP5	-5.79615
138649	ANKRD19P	-5.79436
128977	C22orf39	-5.79371
116840	CNTROB	-5.79169
10395	DLC1	5.79107
197335	WDR90	-5.78959
1992	SERPINB1	-5.78927
641367	LOC641367	5.78881
23586	DDX58	-5.7887
51650	MRPS33	-5.78758
4833	NME4	-5.78616
23760	PITPNB	-5.785
100131564	LOC100131564	-5.78499
51117	COQ4	-5.7843
54510	PCDH18	5.78275
126298	IRGQ	-5.78249
376693	RPS10P7	5.78169
55322	C5orf22	-5.78055
284309	ZNF776	-5.77904
79022	TMEM106C	-5.77754
411	ARSB	-5.77746
1609	DGKQ	-5.77692
5184	PEPD	-5.77497
153339	TMEM167A	-5.77448
653121	ZBTB8A	-5.77346
26050	SLITRK5	5.77314
79792	GSDMD	-5.77222
339263	C17orf51	-5.76882
56133	PCDHB2	-5.76875
83604	TMEM47	5.7684
23549	DNPEP	-5.76745
23767	FLRT3	5.76643
79801	SHCBP1	-5.76474
5351	PLOD1	-5.76284
284207	METRNL	-5.7617
116092	DNTTIP1	-5.75891
3006	HIST1H1C	-5.75758
54543	TOMM7	-5.75659
64949	MRPS26	-5.75503
9650	MTFR1	-5.75403
55168	MRPS18A	-5.75236
25966	C2CD2	-5.75167
119504	ANAPC16	-5.75139
163126	EID2	-5.75081
3554	IL1R1	-5.74996
1345	COX6C	-5.74961
6322	SCML1	-5.74957
9783	RIMS3	-5.7493
54587	MXRA8	-5.74918
6990	DYNLT3	-5.7474
10762	NUP50	-5.74614
146857	SLFN13	-5.74592
54957	TXNL4B	-5.74457
9319	TRIP13	-5.74449
6415	SEPW1	-5.74365
25825	BACE2	-5.74044
285636	C5orf51	-5.73921
64787	EPS8L2	-5.73695
10509	SEMA4B	-5.73254
51275	MAPKAPK5-AS1	-5.73241
374291	NDUFS7	-5.7317
65110	UPF3A	-5.73011
171392	ZNF675	-5.72897
995	CDC25C	-5.72849
10535	RNASEH2A	-5.72736
79624	ARMT1	-5.7269
284439	SLC25A42	-5.72648
100507217	LINC01578	-5.72207
79924	ADM2	-5.72186
5587	PRKD1	5.72118
374899	ZNF829	-5.72046
55651	NHP2	-5.7201
91607	SLFN11	-5.71937
2019	EN1	5.71774
401321	LINC00997	-5.71702
51075	TMX2	-5.7165
280636	C11orf31	-5.71644
84631	SLITRK2	5.71529
11123	RCAN3	-5.71388
10397	NDRG1	-5.71383
51016	EMC9	-5.71104
11174	ADAMTS6	5.70975
6741	SSB	-5.70929
503639	DUXAP10	-5.70755
388753	COA6	-5.70672
55222	LRRC20	-5.70662
131474	CHCHD4	-5.70606
596	BCL2	5.70542
7043	TGFB3	5.70469
199704	ZNF585A	-5.70433
11212	PROSC	-5.70374
729678	LINC00847	-5.70205
50865	HEBP1	-5.70074
55771	PRR11	-5.698
1514	CTSL	-5.697
84299	MIEN1	-5.69686
153769	SH3RF2	-5.69575
79003	MIS12	-5.69429
3930	LBR	-5.69037
64216	TFB2M	-5.68923
81858	SHARPIN	-5.68818
11321	GPN1	-5.68802
5865	RAB3B	-5.6875
285282	RABL3	-5.68693
8330	HIST1H2AK	5.68687
64770	CCDC14	-5.68644
55073	LRRC37A4P	-5.68617
84124	ZNF394	-5.68532
54814	QPCTL	-5.6842
30836	DNTTIP2	-5.68392
81844	TRIM56	-5.68169
4113	MAGEB2	-5.68107
55625	ZDHHC7	-5.67976
84337	ELOF1	-5.67852
9122	SLC16A4	-5.67752
83693	HSDL1	-5.6773
92715	DPH7	-5.67721
409	ARRB2	-5.67656
7145	TNS1	5.67554
5378	PMS1	-5.67552
128239	IQGAP3	-5.67537
10627	MYL12A	-5.67491
57217	TTC7A	-5.67341
210	ALAD	-5.67328
4238	MFAP3	-5.67278
79723	SUV39H2	-5.67161
653653	LOC653653	5.6713
5831	PYCR1	-5.66968
165324	UBXN2A	-5.66737
51024	FIS1	-5.66645
6993	DYNLT1	-5.66592
25994	HIGD1A	-5.66476
84722	PSRC1	-5.66414
6573	SLC19A1	-5.66314
51537	MTFP1	-5.66176
100505687	LINC00888	-5.66124
26137	ZBTB20	5.66082
11169	WDHD1	-5.66078
23780	APOL2	-5.6598
55837	EAPP	-5.65954
8935	SKAP2	-5.65899
3141	HLCS	-5.65886
26258	BLOC1S6	-5.65823
492311	IGIP	5.65732
11054	OGFR	-5.65242
147687	ZNF417	-5.65183
126792	B3GALT6	-5.65103
79640	C22orf46	-5.65052
1556	CYP2B7P	-5.64823
9244	CRLF1	5.6473
2030	SLC29A1	-5.64641
126282	TNFAIP8L1	-5.64615
54520	CCDC93	-5.64514
81889	FAHD1	-5.64503
388552	BLOC1S3	-5.64246
11010	GLIPR1	-5.64132
8612	PPAP2C	-5.63914
54977	SLC25A38	-5.63806
345778	MTX3	-5.63674
8293	SERF1A	-5.63593
256356	GK5	-5.63538
23481	PES1	-5.63512
6810	STX4	-5.63478
114900	C1QTNF4	5.63461
171586	ABHD3	-5.63243
580	BARD1	-5.63176
138050	HGSNAT	-5.63133
9585	KIF20B	-5.63124
283989	TSEN54	-5.62966
11097	NUPL2	-5.6293
221424	LRRC73	5.62928
55798	METTL2B	-5.62862
7625	ZNF74	-5.62767
125206	SLC5A10	-5.62657
7013	TERF1	-5.62623
140885	SIRPA	-5.62548
9410	SNRNP40	-5.62423
64087	MCCC2	-5.62342
3570	IL6R	-5.62253
1525	CXADR	-5.62138
100093630	SNHG8	-5.62115
400655	LOC400655	-5.61848
441518	FAM127C	-5.61563
4741	NEFM	5.61481
7278	TUBA3C	5.6139
54894	RNF43	-5.61369
339290	LINC00667	-5.61275
55778	ZNF839	-5.61127
6891	TAP2	-5.61104
23117	NPIPB3	-5.61005
1616	DAXX	-5.60939
51142	CHCHD2	-5.60819
147991	DPY19L3	-5.60777
10642	IGF2BP1	-5.60643
387640	SKIDA1	5.60252
91574	C12orf65	-5.60086
6748	SSR4	-5.59997
23609	MKRN2	-5.59806
84914	ZNF587	-5.59755
84153	RNASEH2C	-5.59633
92305	TMEM129	-5.59559
256987	SERINC5	-5.59519
253769	WDR27	-5.59482
51026	GOLT1B	-5.59403
378938	MALAT1	-5.59318
112483	SAT2	-5.5926
10347	ABCA7	-5.59079
6838	SURF6	-5.59059
6715	SRD5A1	-5.59009
57326	PBXIP1	-5.58993
3673	ITGA2	-5.58991
92815	HIST3H2A	5.58894
79789	CLMN	-5.58535
114049	WBSCR22	-5.58471
84331	FAM195A	-5.58269
64969	MRPS5	-5.58203
8323	FZD6	-5.58197
54433	GAR1	-5.58192
84612	PARD6B	-5.58148
64718	UNKL	-5.58141
5359	PLSCR1	-5.58018
401505	TOMM5	-5.57759
2241	FER	5.57745
10929	SRSF8	-5.57597
286257	C9orf142	-5.57306
84936	ZFYVE19	-5.57037
64208	POPDC3	-5.56786
10241	CALCOCO2	-5.56748
51030	TVP23B	-5.56728
201161	CENPV	-5.56676
3998	LMAN1	-5.5657
84803	GPAT3	-5.56295
54816	ZNF280D	-5.56275
51333	ZNF771	5.56229
5983	RFC3	-5.56096
8568	RRP1	-5.56025
6827	SUPT4H1	-5.55962
9950	GOLGA5	-5.55949
8443	GNPAT	-5.55881
55631	LRRC40	-5.55833
54621	VSIG10	-5.5583
8634	RTCA	-5.55758
56829	ZC3HAV1	-5.55738
222484	LNX2	-5.55388
100130075	LOC100130075	5.55346
3074	HEXB	-5.55345
84451	KIAA1804	-5.55312
10036	CHAF1A	-5.55169
9466	IL27RA	-5.55166
51491	NOP16	-5.54872
3300	DNAJB2	-5.54835
2035	EPB41	-5.54835
155370	SBDSP1	-5.54602
4211	MEIS1	5.54565
83932	SPRTN	-5.54517
8745	ADAM23	5.54471
58472	SQRDL	-5.54387
4862	NPAS2	-5.53487
26084	ARHGEF26	-5.53485
26271	FBXO5	-5.53481
147694	ZNF548	-5.53453
201254	STRA13	-5.53202
55148	UBR7	-5.52961
125170	MIEF2	-5.52937
51619	UBE2D4	-5.52838
3454	IFNAR1	-5.52678
23529	CLCF1	5.52644
143098	MPP7	-5.52583
11119	BTN3A1	-5.52475
80207	OPA3	-5.52436
84065	TMEM222	-5.5243
404217	CTXN1	5.52359
9338	TCEAL1	-5.5233
340533	KIAA2022	5.52205
406	ARNTL	5.52187
9700	ESPL1	-5.52072
80150	ASRGL1	-5.51947
85363	TRIM5	-5.51938
56255	TMX4	-5.51861
80777	CYB5B	-5.51791
8357	HIST1H3H	5.51733
84793	FOXD2-AS1	-5.51706
26164	MTG2	-5.51676
154007	SNRNP48	-5.51625
23024	PDZRN3	5.51439
284018	C17orf58	-5.51394
65985	AACS	-5.51298
29960	FTSJ2	-5.51273
126299	ZNF428	-5.51142
26040	SETBP1	5.5112
26586	CKAP2	-5.51058
10629	TAF6L	-5.50918
22871	NLGN1	5.50897
79759	ZNF668	-5.5078
767846	PFN1P2	5.50656
23308	ICOSLG	-5.50586
116442	RAB39B	5.50553
10078	TSSC4	-5.50476
23397	NCAPH	-5.50435
84645	C22orf23	-5.50427
79884	MAP9	-5.5039
28974	C19orf53	-5.50337
831	CAST	-5.5026
2651	GCNT2	-5.49931
114625	ERMAP	-5.49909
29904	EEF2K	-5.49895
55055	ZWILCH	-5.49733
100129361	SMIM10L1	-5.49645
26010	SPATS2L	-5.49488
644538	SMIM10	-5.49293
285761	DCBLD1	-5.49227
4882	NPR2	5.49209
170958	ZNF525	-5.49144
93663	ARHGAP18	-5.49031
11037	STON1	-5.48975
23557	SNAPIN	-5.48908
130271	PLEKHH2	-5.4878
80772	CPTP	-5.48769
1028	CDKN1C	-5.48767
84881	RPUSD4	-5.4841
390980	ZNF805	-5.48327
64327	LMBR1	-5.48094
8498	RANBP3	-5.48051
441951	ZFAS1	-5.47949
79888	LPCAT1	-5.47932
10636	RGS14	-5.47926
6196	RPS6KA2	-5.47893
81554	WBSCR16	-5.47801
92689	FAM114A1	-5.47438
10459	MAD2L2	-5.47434
8801	SUCLG2	-5.47425
63982	ANO3	5.47301
6385	SDC4	-5.47209
51398	WDR83OS	-5.47111
131870	NUDT16	-5.47046
79680	C22orf29	-5.47006
2444	FRK	5.46982
57214	CEMIP	5.46891
10542	LAMTOR5	-5.46748
7289	TULP3	-5.46743
85235	HIST1H2AH	5.46695
286499	FAM133A	-5.46556
642852	LOC642852	-5.46541
11334	TUSC2	-5.46518
54436	SH3TC1	-5.46437
79850	FAM57A	-5.46262
5334	PLCL1	5.46258
5641	LGMN	-5.4622
10229	COQ7	-5.46151
5699	PSMB10	-5.46122
90693	CCDC126	-5.46099
64863	METTL4	-5.46014
147727	ILF3-AS1	-5.45981
654346	LGALS9C	5.45928
4969	OGN	5.45836
8645	KCNK5	-5.45829
25989	ULK3	-5.45823
134429	STARD4	-5.45775
79944	L2HGDH	-5.45742
116461	TSEN15	-5.45477
56098	PCDHGC4	5.4533
50855	PARD6A	5.45072
79868	ALG13	-5.45002
115290	FBXO17	-5.44935
284371	ZNF841	-5.44832
22869	ZNF510	-5.44783
9900	SV2A	-5.446
399665	FAM102A	-5.44549
1203	CLN5	-5.44538
10557	RPP38	-5.44514
23582	CCNDBP1	-5.44367
7915	ALDH5A1	-5.44366
285343	TCAIM	-5.44358
84273	NOA1	-5.44305
79036	KXD1	-5.4427
84706	GPT2	-5.44252
100129387	GABPB1-AS1	-5.44238
3155	HMGCL	-5.43883
23741	EID1	-5.43859
57380	MRS2	-5.43828
29950	SERTAD1	-5.43699
1364	CLDN4	-5.43675
4716	NDUFB10	-5.43573
22997	IGSF9B	5.43561
1122	CHML	-5.43529
100131390	SP9	5.43513
8884	SLC5A6	-5.43448
54919	DNAAF5	-5.43437
375061	FAM89A	-5.43402
81928	CABLES2	-5.43358
80270	HSD3B7	-5.43333
147657	ZNF480	-5.43299
123811	FOPNL	-5.43206
91057	CCDC34	-5.43063
4350	MPG	-5.4289
4502	MT2A	-5.42832
284454	LOC284454	-5.42828
84733	CBX2	-5.42739
11343	MGLL	-5.4267
10286	BCAS2	-5.42416
841	CASP8	-5.42362
134510	UBLCP1	-5.42324
2176	FANCC	-5.42295
51373	MRPS17	-5.42168
771	CA12	-5.41991
79068	FTO	-5.41956
64759	TNS3	-5.4193
85450	ITPRIP	-5.4182
10952	SEC61B	-5.41702
5798	PTPRN	5.41682
10423	CDIPT	-5.41627
79753	SNIP1	-5.41616
442075	EMC3-AS1	-5.41552
10947	AP3M2	-5.41431
4698	NDUFA5	-5.41422
79791	FBXO31	-5.41421
286827	TRIM59	-5.41331
6611	SMS	-5.41322
83475	DOHH	-5.413
26255	PTTG3P	-5.41278
79080	CCDC86	-5.41251
401190	RGS7BP	5.4109
81932	HDHD3	-5.41039
950	SCARB2	-5.41012
9906	SLC35E2	-5.40901
79145	CHCHD7	-5.4089
9915	ARNT2	-5.40818
22998	LIMCH1	-5.40619
125144	LRRC75A-AS1	-5.40608
30001	ERO1A	-5.40601
58491	ZNF71	-5.40533
7772	ZNF229	-5.40487
54930	HAUS4	-5.40485
152217	NCBP2-AS2	-5.40425
92344	GORAB	-5.40235
10168	ZNF197	-5.40231
1280	COL2A1	5.40197
51321	AMZ2	-5.40118
11076	TPPP	-5.39769
9380	GRHPR	-5.39748
80017	C14orf159	-5.3971
55143	CDCA8	-5.39707
6617	SNAPC1	-5.39624
90639	COX19	-5.39394
6170	RPL39	-5.39352
9326	ZNHIT3	-5.39327
51528	JKAMP	-5.3923
100101467	ZSCAN30	-5.39149
93343	MVB12A	-5.39146
51534	VTA1	-5.3879
199990	FAAP20	-5.38775
619279	ZNF704	-5.38738
25796	PGLS	-5.38676
79618	HMBOX1	5.3866
148213	ZNF681	-5.38626
10434	LYPLA1	-5.38505
84932	RAB2B	-5.38357
388115	C15orf52	-5.38221
79719	AAGAB	-5.38195
633	BGN	5.38155
768211	RELL1	-5.3814
25888	ZNF473	-5.3806
55556	ENOSF1	-5.3801
2054	STX2	-5.37967
7227	TRPS1	5.3795
27440	CECR5	-5.37927
55353	LAPTM4B	-5.37891
9232	PTTG1	-5.37347
80304	C2orf44	-5.37333
55009	C19orf24	-5.37029
8992	ATP6V0E1	-5.36962
3455	IFNAR2	-5.36729
79871	RPAP2	-5.36688
10585	POMT1	-5.36409
100506190	LINC00963	-5.36297
54865	GPATCH4	-5.36216
196500	PIANP	5.36212
84311	MRPL45	-5.3606
84628	NTNG2	5.36032
84752	B3GNT9	-5.35972
8178	ELL	-5.35935
10940	POP1	-5.35889
58493	INIP	-5.35882
64393	ZMAT3	-5.35855
3275	PRMT2	-5.35853
64960	MRPS15	-5.35832
11243	PMF1	-5.35812
1687	DFNA5	-5.35776
10865	ARID5A	-5.35734
124637	CYB5D1	-5.35675
84318	CCDC77	-5.35641
29074	MRPL18	-5.35233
8458	TTF2	-5.35209
644096	SDHAF1	-5.3511
1854	DUT	-5.35062
7327	UBE2G2	-5.35033
79682	CENPU	-5.34828
55092	TMEM51	-5.3481
2295	FOXF2	5.34796
84527	ZNF559	-5.34785
79056	PRRG4	-5.34774
89932	PAPLN	-5.3468
9816	URB2	-5.34633
6210	RPS15A	-5.34467
79770	TXNDC15	-5.34383
81620	CDT1	-5.34288
148413	LOC148413	-5.34271
81856	ZNF611	-5.33639
63876	PKNOX2	5.33535
51397	COMMD10	-5.33528
113130	CDCA5	-5.33427
100216546	LINC01004	-5.33306
2018	EMX2	5.33273
164091	PAQR7	-5.33164
1468	SLC25A10	-5.33158
80169	CTC1	-5.3314
5985	RFC5	-5.32967
51326	ARL17A	-5.32921
3305	HSPA1L	5.32864
1368	CPM	-5.32797
57509	MTUS1	-5.3278
11163	NUDT4	-5.32653
7869	SEMA3B	-5.32652
25845	PP7080	-5.32591
60672	MIIP	-5.32528
60529	ALX4	5.32496
2618	GART	-5.3248
51329	ARL6IP4	-5.32359
54108	CHRAC1	-5.32283
135293	PM20D2	-5.32202
79575	ABHD8	-5.31936
84823	LMNB2	-5.31804
858	CAV2	-5.31776
51295	ECSIT	-5.31739
286046	XKR6	5.31737
647979	LINC00657	-5.31718
10955	SERINC3	-5.3153
152185	SPICE1	-5.31464
83549	UCK1	-5.3139
154881	KCTD7	-5.31387
8192	CLPP	-5.3121
54863	TOR4A	-5.31088
400043	LOC400043	-5.31063
5793	PTPRG	5.31052
4942	OAT	-5.30923
4291	MLF1	-5.30815
54465	ETAA1	-5.30805
10875	FGL2	5.30797
51562	MBIP	-5.30678
25936	NSL1	-5.30549
4832	NME3	-5.30478
3090	HIC1	5.30436
1264	CNN1	5.30427
2675	GFRA2	5.30424
5310	PKD1	-5.30379
6392	SDHD	-5.30358
54942	FAM206A	-5.3035
51236	HGH1	-5.30335
9837	GINS1	-5.30328
84939	MUM1	-5.30294
80086	TUBA4B	5.29954
163882	CNST	-5.29922
84817	TXNDC17	-5.29894
10622	POLR3G	-5.2989
348654	GEN1	-5.2988
6726	SRP9	-5.29849
79736	TEFM	-5.29685
9534	ZNF254	-5.29681
57505	AARS2	-5.29616
7076	TIMP1	-5.29596
11142	PKIG	-5.29583
9928	KIF14	-5.29526
90871	TMEM261	-5.29491
51527	GSKIP	-5.29387
51299	NRN1	5.29385
3459	IFNGR1	-5.29312
10311	DSCR3	-5.2925
100499467	LINC00673	-5.29155
706	TSPO	-5.29135
56479	KCNQ5	5.28962
81706	PPP1R14C	-5.28955
80818	ZNF436	-5.28676
7270	TTF1	-5.28663
54585	LZTFL1	-5.28658
5874	RAB27B	-5.28636
55619	DOCK10	-5.2855
64745	METTL17	-5.2844
79089	TMUB2	-5.28432
8045	RASSF7	-5.28409
11344	TWF2	-5.28389
340371	NRBP2	-5.28332
7083	TK1	-5.28092
283624	LINC00641	-5.27939
55504	TNFRSF19	-5.27933
64927	TTC23	-5.27885
6901	TAZ	-5.27808
10370	CITED2	5.27729
56938	ARNTL2	-5.2764
410	ARSA	-5.27532
223117	SEMA3D	5.27426
643837	LINC01128	-5.2731
26032	SUSD5	-5.27197
90121	TSR2	-5.2716
58488	PCTP	-5.27072
3426	CFI	-5.27043
81631	MAP1LC3B	-5.26951
64976	MRPL40	-5.26879
79623	GALNT14	-5.2686
85379	KIAA1671	-5.26851
310	ANXA7	-5.26844
53838	C11orf24	-5.26648
91289	LMF2	-5.26523
653269	POTEI	5.26503
1727	CYB5R3	-5.26375
4983	OPHN1	-5.26356
5316	PKNOX1	-5.26293
5789	PTPRD	5.26097
2308	FOXO1	5.26046
653319	KIAA0895L	-5.26007
36	ACADSB	-5.25872
9939	RBM8A	-5.25733
162972	ZNF550	-5.25609
55502	HES6	-5.25593
90313	TP53I13	-5.25569
79711	IPO4	-5.25554
205251	LINC00116	-5.25456
388591	RNF207	-5.25396
79989	TTC26	-5.2529
79637	ARMC7	-5.25252
414777	HCG18	-5.25152
64421	DCLRE1C	-5.2513
80179	MYO19	-5.25115
2135	EXTL2	-5.25108
23414	ZFPM2	5.25065
285521	COX18	-5.25046
51665	ASB1	-5.25043
730262	PPIAL4E	5.25007
5695	PSMB7	5.24994
80198	MUS81	-5.24973
9013	TAF1C	-5.24959
9473	THEMIS2	-5.24875
25782	RAB3GAP2	-5.24805
150759	LINC00342	-5.2478
257177	CFAP126	-5.24645
9509	ADAMTS2	5.24624
129790	C7orf13	-5.24575
91942	NDUFAF2	-5.24506
2487	FRZB	5.24499
113878	DTX2	-5.24454
2717	GLA	-5.24326
163081	ZNF567	-5.24212
29920	PYCR2	-5.24052
9419	CRIPT	-5.24024
246243	RNASEH1	-5.23999
148137	PROSER3	-5.2391
7157	TP53	-5.23888
51133	KCTD3	-5.23876
29097	CNIH4	-5.23822
1777	DNASE2	-5.23781
54557	SGTB	-5.23735
84984	CEP19	-5.23658
5063	PAK3	5.23651
5568	PRKACG	5.23625
23306	NEMP1	-5.23487
10591	DNPH1	-5.23467
6717	SRI	-5.23451
85352	KIAA1644	-5.2343
55449	DHRS4-AS1	-5.23341
7424	VEGFC	5.23291
1389	CREBL2	-5.23082
23192	ATG4B	-5.2286
55974	SLC50A1	-5.22829
55352	COPRS	-5.2281
4668	NAGA	-5.22787
727956	SDHAP2	-5.22728
6697	SPR	-5.22722
2803	GOLGA4	-5.22654
79701	OGFOD3	-5.22638
8394	PIP5K1A	-5.22635
22900	CARD8	-5.22574
51768	TM7SF3	-5.22567
29928	TIMM22	-5.22387
120892	LRRK2	5.22382
57655	GRAMD1A	-5.22277
440515	ZNF506	-5.22129
1841	DTYMK	-5.2207
56623	INPP5E	-5.22017
355	FAS	-5.22011
10618	TGOLN2	-5.21991
117581	TWIST2	5.21957
5873	RAB27A	-5.21825
8517	IKBKG	-5.21786
590	BCHE	-5.21779
150726	FBXO41	-5.21692
22835	ZFP30	-5.21671
8974	P4HA2	-5.21635
78996	C7orf49	-5.21612
286262	TPRN	-5.21548
64946	CENPH	-5.21464
9170	LPAR2	-5.21443
51530	ZC3HC1	-5.21403
891	CCNB1	-5.21356
723972	ANP32AP1	-5.21303
23030	KDM4B	-5.21225
4599	MX1	-5.21147
90864	SPSB3	-5.21144
23151	GRAMD4	-5.21099
23324	MAN2B2	-5.21057
112487	DTD2	-5.21041
9236	CCPG1	-5.20954
51335	NGRN	-5.20925
200765	TIGD1	-5.20865
6674	SPAG1	-5.20857
54555	DDX49	-5.20787
84888	SPPL2A	-5.20785
613037	LOC613037	-5.20736
10612	TRIM3	5.20705
283358	B4GALNT3	-5.20693
57146	TMEM159	-5.20689
56977	STOX2	5.20679
25874	MPC2	-5.20667
90784	LOC90784	-5.20596
55707	NECAP2	-5.20422
25895	METTL21B	-5.20377
28958	COA3	-5.20334
91664	ZNF845	-5.20207
55319	TMA16	-5.20178
55276	PGM2	-5.20152
51361	HOOK1	-5.20123
4616	GADD45B	-5.19924
3685	ITGAV	-5.19856
79794	C12orf49	-5.19834
729852	UMAD1	-5.19744
390927	ZNF793	-5.1971
8795	TNFRSF10B	-5.19692
90338	ZNF160	-5.19668
55743	CHFR	-5.19449
7570	ZNF22	-5.19111
4695	NDUFA2	-5.18978
84798	C19orf48	-5.18962
55196	KIAA1551	-5.18959
2938	GSTA1	5.1875
90381	TICRR	-5.18743
84883	AIFM2	-5.18718
25983	NGDN	-5.18654
2224	FDPS	-5.18623
79838	TMC5	-5.18501
94081	SFXN1	-5.18444
972	CD74	-5.18384
79752	ZFAND1	-5.18354
4522	MTHFD1	-5.18342
1601	DAB2	5.18327
55332	DRAM1	-5.18318
114908	TMEM123	-5.18286
84274	COQ5	-5.18261
9831	ZNF623	-5.18248
55789	DEPDC1B	-5.17961
384	ARG2	-5.17959
10019	SH2B3	-5.17935
51092	SIDT2	5.17835
10577	NPC2	-5.17761
2987	GUK1	-5.1776
80174	DBF4B	-5.1776
27434	POLM	-5.17702
1903	S1PR3	-5.17683
55247	NEIL3	-5.17556
54751	FBLIM1	-5.17538
3945	LDHB	-5.17508
79744	ZNF419	-5.17455
64478	CSMD1	5.17401
10165	SLC25A13	-5.17258
10793	ZNF273	-5.1721
200316	APOBEC3F	-5.17138
201514	ZNF584	-5.17006
65057	ACD	-5.16869
11149	BVES	-5.16848
400966	RGPD1	5.16757
100506658	OCLN	-5.16729
51372	TMA7	-5.16722
85015	USP45	-5.16599
100532732	MSH5-SAPCD1	-5.16582
84260	TCHP	-5.16573
51020	HDDC2	-5.16563
10617	STAMBP	-5.1644
90853	SPOCD1	-5.16431
5300	PIN1	-5.16376
337875	HIST2H2BA	5.16311
54093	SETD4	-5.16252
6100	RP9	-5.16241
22807	IKZF2	5.16188
54898	ELOVL2	-5.15644
347688	TUBB8	5.15568
819	CAMLG	-5.15556
129787	TMEM18	-5.1542
339230	CCDC137	-5.15407
55246	CCDC25	-5.15404
8702	B4GALT4	-5.15389
3030	HADHA	-5.15237
55709	KBTBD4	5.15226
140883	ZNF280B	-5.15178
9556	C14orf2	-5.15118
7297	TYK2	-5.15089
80154	GOLGA2P10	-5.14947
92856	IMP4	-5.14882
7918	GPANK1	-5.14881
10207	INADL	-5.14865
26123	TCTN3	-5.148
25909	AHCTF1	-5.14748
5307	PITX1	-5.14727
1535	CYBA	-5.14598
126308	MOB3A	-5.14593
10826	FAXDC2	-5.14585
23294	ANKS1A	-5.14585
79720	VPS37B	-5.14476
9294	S1PR2	-5.14476
80264	ZNF430	-5.14431
339448	C1orf174	-5.14378
8031	NCOA4	-5.14305
5915	RARB	5.14295
55364	IMPACT	-5.14293
84255	SLC37A3	-5.14247
9918	NCAPD2	-5.14134
57404	CYP20A1	-5.14126
54884	RETSAT	-5.14107
55500	ETNK1	-5.14096
148266	ZNF569	-5.14092
65095	KRI1	-5.14046
5891	MOK	-5.14017
22874	PLEKHA6	-5.1401
124512	METTL23	-5.13914
51186	WBP5	-5.13891
3576	CXCL8	-5.13825
1827	RCAN1	-5.1372
9805	SCRN1	-5.13717
6687	SPG7	-5.13648
56675	NRIP3	-5.1337
374928	ZNF773	-5.13211
9562	MINPP1	-5.13176
56603	CYP26B1	5.12988
1786	DNMT1	-5.129
65983	GRAMD3	-5.12875
114790	STK11IP	-5.12726
29128	UHRF1	-5.12695
83543	AIF1L	-5.12632
84879	MFSD2A	-5.12626
3953	LEPR	-5.12599
8270	LAGE3	-5.12394
[truncated: 15,154 more rows]
